# Supplementary material
Source: PubMed Central journal article supplement (PMC7776876)
Supplement: pnas.2018488117.sapp.pdf [file pnas.2018488117.sapp.pdf]

1 **Supplementary Information for**

2 **IBEX – A versatile multi-plex optical imaging approach for deep phenotyping and spatial**  
3 **analysis of cells in complex tissues**

4 Andrea J. Radtke<sup>1,11,\*</sup>, Evelyn Kandov<sup>2,3,11</sup>, Bradley Lowekamp<sup>4</sup>, Emily Speranza<sup>2,5</sup>, Colin J. Chu<sup>2</sup>,  
5 Anita Gola<sup>2,6</sup>, Nishant Thakur<sup>2</sup>, Rochelle Shih<sup>2,6</sup>, Li Yao<sup>7</sup>, Ziv Rafael Yaniv<sup>4</sup>, Rebecca T. Beuschel<sup>1</sup>,  
6 Juraj Kabat<sup>8</sup>, Joshua Croteau<sup>9</sup>, Jeremy Davis<sup>10</sup>, Jonathan M. Hernandez<sup>10</sup>, and Ronald N.  
7 Germain<sup>1,2,\*</sup>

8 <sup>1</sup>Center for Advanced Tissue Imaging, Laboratory of Immune System Biology, NIAID, NIH,  
9 Bethesda, MD, USA

10 <sup>2</sup>Lymphocyte Biology Section, Laboratory of Immune System Biology, NIAID, NIH, Bethesda, MD,  
11 USA

12 <sup>3</sup>Vanderbilt University School of Medicine, Nashville, TN, USA

13 <sup>4</sup>Bioinformatics and Computational Bioscience Branch, NIAID, NIH, Bethesda, MD, USA

14 <sup>5</sup>Innate Immunity and Pathogenesis Section, Laboratory of Virology, NIAID, NIH, Hamilton, MT,  
15 USA

16 <sup>6</sup>The Rockefeller University, New York, NY, USA

17 <sup>7</sup>Howard Hughes Medical Institute, Chevy Chase, MD, USA

18 <sup>8</sup>Biological Imaging Section, Research Technologies Branch, NIAID, NIH, Bethesda, MD, USA

19 <sup>9</sup>BioLegend, Inc., San Diego, CA, USA

20 <sup>10</sup>Surgical Oncology Program, Metastasis Biology Section, Center for Cancer Research, National  
21 Cancer Institute, NIH

22 <sup>11</sup>Co-first authors

23 \*Co-corresponding authors: Andrea Radtke (andrea.radtke@nih.gov); Ronald Germain,  
24 (rgermain@niaid.nih.gov)

25

26 **This PDF includes:**

27 Supplemental Methods

28 Figures S1-S7 and Legends

29 Tables S1-S5

30 Movies S1-S9 Legends

31 SI References

32

33

## 34 **Supplemental Methods**

### 35 **Animals, immunizations, and tissue preparations**

36 5-12 week old naïve C57BL/6 and *Cxcl9*<sup>-/-</sup> mice were purchased from Jackson Laboratories  
37 (Bar Harbor, ME) and maintained at a facility at the NIH. Fluorescent Confetti animals were  
38 generated by crossing B6.129P2-Gt(ROSA)26Sortm1(CAG-Brainbow2.1)Cle/J × B6.Cg-Tg(UBC-  
39 cre/ERT2)1Ejb/2J and LysM-tdTomato mice were generated by crossing LysM-Cre x B6.Cg-  
40 Gt(ROSA)26Sortm14(CAG-tdTomato)Hze/J (Jackson Laboratory). Fluorescent Confetti animals  
41 heterozygous for both transgenes were injected intraperitoneally (i.p.) with tamoxifen 100 µg per  
42 gram of body weight in peanut oil (Sigma-Aldrich) on day 0 and day 2 and tissues were collected  
43 on day 4 for processing. To evaluate changes in the immune cell composition and LN architecture  
44 following immunization, sheep red blood cells (SRBCs, Colorado Serum Company) were prepared  
45 by resuspending 3 mL of SRBCs in 10 mL of Hanks' Balanced Salt Solution (HBSS, Sigma-Aldrich).  
46 Mice were injected subcutaneously (s.c.) with SRBCs in a volume of 25-50 µl per site on day 0 and  
47 day 4 with organs harvested on day 11. Unless stated otherwise, all tissues were treated similarly  
48 and embedded as whole organs. Prior to fixation, murine livers and lungs were perfused with PBS  
49 in order to remove blood. The ileal portion of the small intestine was excised and prepared using  
50 the Swiss roll technique (1). Livers were collected from LysM-tdTomato mice and processed as  
51 described previously (2). Lungs were inflated with 10 ml of fixative via a tracheal cannula before  
52 harvest (3). Lungs were then tethered to a small weight and fixed overnight in BD  
53 CytoFix/CytoPerm (BD Biosciences) diluted in PBS (1:4). Following fixation, all tissues were  
54 washed briefly (5 minutes per wash) in PBS and incubated in 30% sucrose for 2 days before  
55 embedding in OCT compound (Tissue-Tek).

56

### 57 **Additional considerations for IBEX method**

58 For optimal results, it is important to be aware of the expiration date of the chrome gelatin  
59 alum and to follow these steps for coating chambers and glass slides: 1) spread the adhesive  
60 evenly over the imaging substrate, 2) dry 1 hour at 60° C, 3) section tissue onto coated chamber  
61 or glass slide, 4) dry for 1 hour at 37° C, and 5) work with freshly prepared samples (don't store at  
62 -20° C). In order to achieve efficient bleaching, always use 1 mg/ml solutions of LiBH<sub>4</sub> within 4  
63 hours of preparation and wait until large bubbles form before adding to tissue (usually 10 minutes  
64 after dissolving in diH<sub>2</sub>O). Be careful as LiBH<sub>4</sub> can react violently with water. To avoid flames,  
65 always work with small amounts (<10 mg) of LiBH<sub>4</sub>. Store LiBH<sub>4</sub> with desiccant and use a new vial  
66 of LiBH<sub>4</sub> after 4 weeks of use. As noted in the "IBEX using inverted confocal microscope" section  
67 of the Methods section, Brilliant Violet 421 (BV421) and Brilliant Violet 510 (BV510) dyes require  
68 LiBH<sub>4</sub> bleaching in the presence of light (metal halide lamp with the DAPI filter). To ensure efficient

69 bleaching of BV421 and BV510 conjugates, we assess bleaching in real time by viewing the LiBH<sub>4</sub>-  
70 incubated samples under the microscope, bleaching a field of view (1-2 minutes), and moving to  
71 an adjacent field of view (1-2 minutes). This process is repeated until the entire region of interest  
72 is bleached. Of note, the time required for this process is dependent on the imaging area and  
73 objective used for bleaching with larger areas requiring longer overall bleaching times. As an  
74 example, a tissue section from a mouse LN (1-2 mm) can be readily bleached in 15 minutes using  
75 this approach. Another consideration is that all images be oriented identically in the Z stack (same  
76 begin and end) for proper alignment with SimpleITK. For gross observation and visualization, we  
77 found that IBEX-generated images could be aligned using Imaris 9.5.0 (Bitplane) by “adding  
78 images” and manually aligning images with the reference manager. Alternatively, the image  
79 alignment feature under the image processing menu was used to provide a rough assessment of  
80 image registration before submitting IBEX-generated images to the SimpleITK workflow.

81

## 82 **Ensuring optimal imaging quality: Antibody validation and controls**

83 Selection of antibodies that bind their targets with great specificity while yielding  
84 reproducible immunolabeling across different samples is critical for all imaging methods. Wherever  
85 possible, we utilize highly cited antibodies previously validated for immunofluorescence of fixed  
86 frozen tissues. Upon identifying suitable antibody candidates for our imaging workflow, we note the  
87 location (membrane, cytoplasm, nucleus) and tissue distribution of the marker of interest.  
88 Additionally, we procure positive and negative control tissues based on the described expression  
89 of a particular marker. Finally, we pair the new antibody with previously validated markers that co-  
90 stain the same cell type. For example, the SPARC antibody (R&D AF941) is reported to label  
91 macrophages, fibroblasts, and endothelial cells within human tissues. To validate this antibody, we  
92 evaluate the spatial distribution of the anti-SPARC antibody in human LNs co-stained with CD3  
93 (negative) and CD11c and CD31 (positive controls). Prior to all iterative imaging, antibodies are  
94 tested for their sensitivity to LiBH<sub>4</sub> by pretreating tissue sections with LiBH<sub>4</sub> for 15 minutes. To  
95 evaluate whether epitopes are sensitive to LiBH<sub>4</sub>, staining patterns for individual antibodies are  
96 compared between serial sections with or without LiBH<sub>4</sub> pre-treatment. As an additional control,  
97 individual panels are acquired on serial sections in parallel with iterative rounds of imaging. The  
98 spatial distribution patterns are then compared between the serially and iteratively acquired images  
99 for each antibody to ensure there is no epitope loss or steric hindrance with cyclic imaging. Finally,  
100 antibody concentrations vary greatly depending on the tissue, fixation conditions, and imaging  
101 system employed. For these reasons, we strongly recommend careful titration of all antibodies prior  
102 to IBEX imaging.

103

## 104 **IBEX imaging conditions for inverted confocal microscope**

105           Representative sections from different tissues were acquired using an inverted Leica TCS  
106 SP8 X confocal microscope equipped with a 40X objective (NA 1.3), 4 HyD and 1 PMT detectors,  
107 a white light laser that produces a continuous spectral output between 470 and 670 nm as well as  
108 405, 685, and 730 nm lasers. Panels consisted of antibodies conjugated to the following  
109 fluorophores and dyes: Hoechst, BV421, BV510, AF488, AF532, JOJO-1, PE, eF570, AF555,  
110 AF594, AF647, eF660, and AF700. All images were captured at an 8-bit depth, with a line average  
111 of 3, and 1024x1024 format with the following pixel dimensions: x (0.284  $\mu\text{m}$ ), y (0.284  $\mu\text{m}$ ), and z  
112 (1-1.25  $\mu\text{m}$ ). Images were tiled and merged using the LAS X Navigator software (LAS X  
113 3.5.5.19976). To ensure proper alignment over distinct imaging cycles, careful attention was paid  
114 to the quality of image stitching achieved with the Leica software and z-stacks were set by manual  
115 inspection of notable features such as unusually shaped nuclei throughout the tissue volume.  
116 These unusual features were matched across the z-stack and over multiple cycles of IBEX.

117

#### 118 **Adoption of IBEX to additional imaging systems**

119           For adoption of the IBEX protocol to an upright Leica TCS SP8 X confocal microscope, 20-  
120 30  $\mu\text{m}$  sections were adhered to Super Frost Plus Gold slides (Electron Microscopy Services)  
121 coated with 30  $\mu\text{l}$  of chrome alum gelatin. The IBEX protocol was executed as described above  
122 with the following exceptions: slides were mounted with a No. 1.5 coverslip (VWR) and antibody  
123 panels were designed without BV421 and BV510 conjugated antibodies. These conjugates were  
124 omitted because they require the tissue to be immersed in  $\text{LiBH}_4$  while illuminated with the metal  
125 halide lamp, an impossibility for samples mounted on slides. Following image acquisition,  
126 coverslipped slides were immersed in PBS until the coverslip floated off. Non-coverslipped slides  
127 were incubated with  $\text{LiBH}_4$  for 15 minutes, washed extensively in PBS, immunolabeled with the  
128 next round of antibodies, mounted with Fluoromount G, and coverslipped. Image acquisition  
129 parameters and system configurations were identical to the details listed for the inverted Leica TCS  
130 SP8 X confocal microscope with the exception of the 685 nm laser. For adoption of the IBEX  
131 protocol to an inverted fluorescent microscope, 5-10  $\mu\text{m}$  sections were adhered to Super Frost Plus  
132 Gold slides coated with chrome alum gelatin. Slides were mounted with a coverslip and antibody  
133 panels were designed with the following fluorophores and dyes: Hoechst (Biotium), AF488, PE,  
134 and AF647. Representative sections were acquired using a Keyence BZ-X800 microscope  
135 equipped with a 40X objective, metal halide lamp, and DAPI, GFP, TRITC, and Cy5 filter sets. All  
136 images were captured using the auto-exposure settings for each channel at standard resolution  
137 yielding an 8-bit image. Haze reduction was applied post-acquisition to improve image quality.

138

#### 139 **Image analysis and quantification**

140 Fluorophore emission was collected on separate detectors with sequential laser excitation  
141 of compatible fluorophores (3-4 per sequential) used to minimize spectral spillover. The Channel  
142 Dye Separation module within the LAS X 3.5.5.19976 (Leica) was then used to correct for any  
143 residual spillover. Threshold identification, voxel gating, surface creation, and masking were  
144 performed as previously described (4, 5). For publication quality images, gaussian filters,  
145 brightness/contrast adjustments, and channel masks were applied uniformly to all images. Unless  
146 stated otherwise, images are presented as maximum intensity projections (MIP) of tiled z-stacks.  
147 Quantification of cell surfaces was based on images with unadjusted gamma values. To calculate  
148 the amount of signal remaining after LiBH<sub>4</sub> bleaching (Figs. 1D and S7B), the Color Pixel Counter  
149 plugin developed by Ben Pichette for FIJI was used (6). The Structural SSIMilarity (SSIM) index, a  
150 method for measuring the similarity between 2 images, was used to assess whether LiBH<sub>4</sub>  
151 treatment removed primary antibodies from the tissues (7) (Fig. S2). The surface creation module  
152 of Imaris 9.5.0 (Bitplane) was used to segment cells based on the nuclear marker Hoechst (Figs.  
153 S1C or S5B) or CFP+, GFP+, YFP+, or RFP+ expression (Fig. S4B). For consistency,  
154 segmentation conditions were applied as a batch using identical parameters. Segmented cells were  
155 randomly colored and manually inspected to assess the quality of segmentation based on Hoechst  
156 or FP staining. For Fig. S5B, segmentation on Hoechst+ cells provided accurate identification of  
157 round, regular shaped, lymphocytes but, as expected, struggled with morphologically complex  
158 stromal and structural cell segmentation. Nevertheless, this approach provided a relative  
159 quantification for the number of surfaces positive for each individual marker. Importantly, these  
160 qualitative measures were in agreement with the amount of signal present by visual inspection.  
161 Surfaces were scored positive for a given marker based on absolute intensity values generated in  
162 Imaris and these values were applied uniformly to serial and IBEX-generated images to quantify  
163 marker-positive surfaces (Fig. S5B).

#### 164 **histoCAT analysis of IBEX-generated images**

165 Using the workflow described previously (8), IBEX-generated images were segmented  
166 using Ilastik (Version 1.3.3) (9) and CellProfiler (Version 3.1.9) (10). Briefly, B220, CD3, and CD45  
167 (most of the immune cells) markers were merged into a single membrane and JOJO-1 was used  
168 as a nuclear marker. Membrane and nuclear Images were loaded into Ilastik for supervised training  
169 of pixel segmentation. The trained Ilastik model classified image pixels into 3 classes (membrane,  
170 nuclear, and background) and generated probability maps for CellProfiler for cellular objects  
171 segmentation. CellProfiler-generated object/mask images were exported as TIFF files for  
172 downstream analysis. To quantify marker expression, individual marker images, along with masks,  
173 were loaded into histoCAT and Phenograph clustering with default parameters was performed.  
174 Phenograph consistently identified 29 different clusters/phenotypes (Fig. 4B). Hierarchical  
175 clustering and heatmap (Fig. S6B) were generated from the Phenograph output using the Seaborn

176 Python package. The high-dimensional single-cell data was projected onto 2 dimensions using the  
177 t-SNE module in histoCAT for visualization purposes shown in Fig. 4B. Cellular populations  
178 identified in Fig. 4C were manually phenotyped based on the cellular markers expressed within  
179 each Phenograph cluster and summarized in the heat map found in Fig. S6B: CD4<sup>+</sup> T (cluster 3),  
180 CD8<sup>+</sup> T (cluster 2), Tfh (cluster 19), Tregs (cluster 18), naïve B (cluster 5), MHCII<sup>Hi</sup> B (cluster 13),  
181 PCs (cluster 10), GC B (cluster 6), CD68<sup>+</sup> macrophages (cluster 15), CD206<sup>+</sup> macrophages (cluster  
182 11), SCS macrophages (cluster 17), MS macrophages (cluster 25), pan DC (cluster 4), cDC1/dDCs  
183 (cluster 22), and cDC2s (cluster 26). A median of ratios method (11) was performed for the cell  
184 count normalization (Fig. S6D). All histoCAT analysis was done on an iMAC, (Retina 5K, 27-inch,  
185 2017, 4.2Ghz i7, 64G RAM) with macOS Mojave operating system.

### 186 **Multi-plex Opal IHC on heavily fixed tissues**

187 pLNs were collected from naïve mice and fixed at 4° C for 8 days in 10% neutral-buffered  
188 formalin (Cancer Diagnostics). Following fixation, samples were washed in PBS to remove formalin  
189 and embedded in paraffin blocks. 5 µm sections were cut from paraffin blocks, mounted on slides,  
190 and left at 37° C for 16 hours to dry. Slides were incubated at 60° C for 45 minutes, dewaxed using  
191 a standard protocol of 10 minutes in xylene (2 times), and rehydrated with graded concentrations  
192 of ethanol and water (100% ethanol for 10 minutes, 95% ethanol for 10 minutes, 70% ethanol for  
193 5 minutes). Following dewaxing, slides were first rinsed in water and tissues were fixed to the slides  
194 by placing in 10% formalin for 15 minutes, rinsed in water, and then placed in TBST (1X TBS +  
195 0.5% Tween20 (Thermo)) to prevent drying out. Antigen retrieval was performed using the AR6  
196 buffer from the Opal Multi-plex kit (Akoya Biosciences) using a conventional microwave at 100%  
197 power for 45 seconds followed by 10% power for 15 minutes. To perform multi-plex Opal IHC,  
198 tissue sections were first blocked in Opal antibody diluent/blocking buffer (Akoya Biosciences) for  
199 10 minutes. Next, unconjugated primary antibodies were added to the tissue for 12-16 hours at 4°  
200 C, 4 hours at room temperature, or 30 minutes using the PELCO BioWave Pro 36500-230  
201 microwave described under 'IBEX using inverted confocal microscope' section of the Material and  
202 Methods. After primary antibody incubation, samples were washed with TBST and an Opal anti-  
203 rabbit HRP-conjugated secondary antibody was added at a dilution of 1:5 for 10 minutes at room  
204 temperature or with a species matched HRP-conjugated secondary antibody for 1 hour at room  
205 temperature. Samples were washed several (5-6) times with TBST and Opal dyes (diluted 1:100  
206 in 1X amplification buffer (Akoya Biosciences)) were added to the sample and incubated for 10  
207 minutes at room temperature. Following this last step, samples were washed with TBST and  
208 antigen retrieval/antibody stripping was performed using the AR6 buffer and conventional  
209 microwave treatment described above. This series of steps—primary antibody incubation,  
210 incubation with HRP-conjugated secondary, labeling with Opal dye, antibody stripping—was  
211 repeated for the following Opal fluorophores to achieve 6-plex imaging: Opal 520, 540, 570, 620,

212 650, and 690. Slides were mounted and imaged with an upright Leica TCS SP8 X confocal  
213 microscope as described above. After representative images were captured, coverslips were  
214 removed and tissue sections were treated with 1 mg/mL of LiBH<sub>4</sub> prepared in diH<sub>2</sub>O for 30 minutes  
215 to bleach the Opal 570, 650, and 690 dyes. Cycles of multi-plex Opal IHC and IBEX were repeated  
216 to achieve the desired number of markers. Individual images were aligned and processed as  
217 described above. A complete list of antibodies and reagents can be found in Table S4.

#### 218 **Chemokine staining for endogenous CXCL9**

219 Livers were collected from naïve WT and *Cxcl9*<sup>-/-</sup> animals, perfused with 1% PFA through  
220 the portal vein, and fixed at 4° C for 12-16 hours in BD CytoFix/CytoPerm diluted 1:4 in PBS.  
221 Samples were incubated in sucrose for 24 hours at 4° C and frozen in OCT. To visualize  
222 endogenous CXCL9 levels, 20 µm sections were rehydrated in PBS, incubated in 0.1% H<sub>2</sub>O<sub>2</sub> for  
223 30 minutes to quench endogenous peroxidase, and incubated with unconjugated (CXCL9) and  
224 fluorescently-conjugated primary antibodies. Tissue sections were washed to remove unbound  
225 antibodies, fixed with 10% formalin to cross-link the bound antibodies to the tissue, washed with  
226 TBST, and an Opal anti-rabbit HRP-conjugated secondary antibody was added at a dilution of 1:5  
227 for 10 minutes at room temperature. Following secondary antibody incubation, samples were  
228 washed in TBST and the Opal 650 dye (diluted 1:100 in 1X amplification buffer) was added for 5  
229 minutes. Slides were washed, mounted in Fluoromount G, and imaged as described above. A  
230 complete list of antibodies and reagents can be found in Table S4.

#### 231 **Incorporation of TotalSeqA™ antibodies into IBEX workflow**

232 LNs from C57BL/6 mice were harvested and processed as described above. Integrating  
233 published methods, slides containing 30 µm sections were blocked for 30 minutes at room  
234 temperature in Buffer A (PBS supplemented with 5% donkey serum (Jackson Immunoresearch),  
235 200 µg/ml sheared salmon sperm (Thermo), 0.2% Triton X-100 (Sigma) and 5 µg/ml Fc-block  
236 (Thermo)). Immunolabeling was conducted using Buffer A with the addition of 5 mM EDTA and  
237 0.02% Dextran sulfate, TotalSeqA™ antibodies (5 µg/ml), and fluorophore-conjugated antibodies  
238 at the indicated concentrations (Table S1) (12). All primary antibody incubations were performed  
239 using the PELCO BioWave Pro 36500-230 microwave as described in the “IBEX using inverted  
240 confocal microscope’ section of the Materials and Methods. Following antibody incubation, slides  
241 were washed using PBS with 0.1% Triton X-100 and post-fixed with 5 mM of BS(PEG)5 (Thermo)  
242 for 10 minutes before quenching with 100 mM Ammonium Chloride (Sigma). After washing with  
243 PBS, Fluoromount G was applied and fluorescently-conjugated antibodies were imaged in the first  
244 cycle. Mounting medium was removed by washing with PBS before bleaching with LiBH<sub>4</sub> for 15  
245 minutes. For *in situ* visualization of TotalSeqA™ antibodies, oligonucleotides were designed

246 complementary to the TotalSeqA™ barcode. These complementary oligonucleotides were  
247 synthesized by Integrated DNA Technologies (IDT) and 5'-end conjugated with indicated  
248 fluorophores before HPLC purification (Table S5). Direct labeling of TotalSeqA™ antibodies with  
249 complementary fluorescent oligonucleotides was achieved by adding 1 μM concentrations of  
250 imager oligonucleotides in PBS with 0.1% Triton X-100 and incubating for 30 minutes at room  
251 temperature. Tissue sections were washed with 0.5X PBS and 0.1% Triton X-100, mounted, and  
252 imaged (Cycle 2 of IBEX). After removal of Fluoromount G, oligonucleotides were dehybridized for  
253 15 minutes by incubation with a 0.1X PBS solution containing 30% Formamide. Following 5-6  
254 exchanges of PBS, the next set of oligonucleotides (Cycle 3) was applied as before.

255

256

257

258

259

260

261

262

263

264

265

266

267

268

269

270

271

272

273

274

275



276 **Figures S1-S7 and Legends**

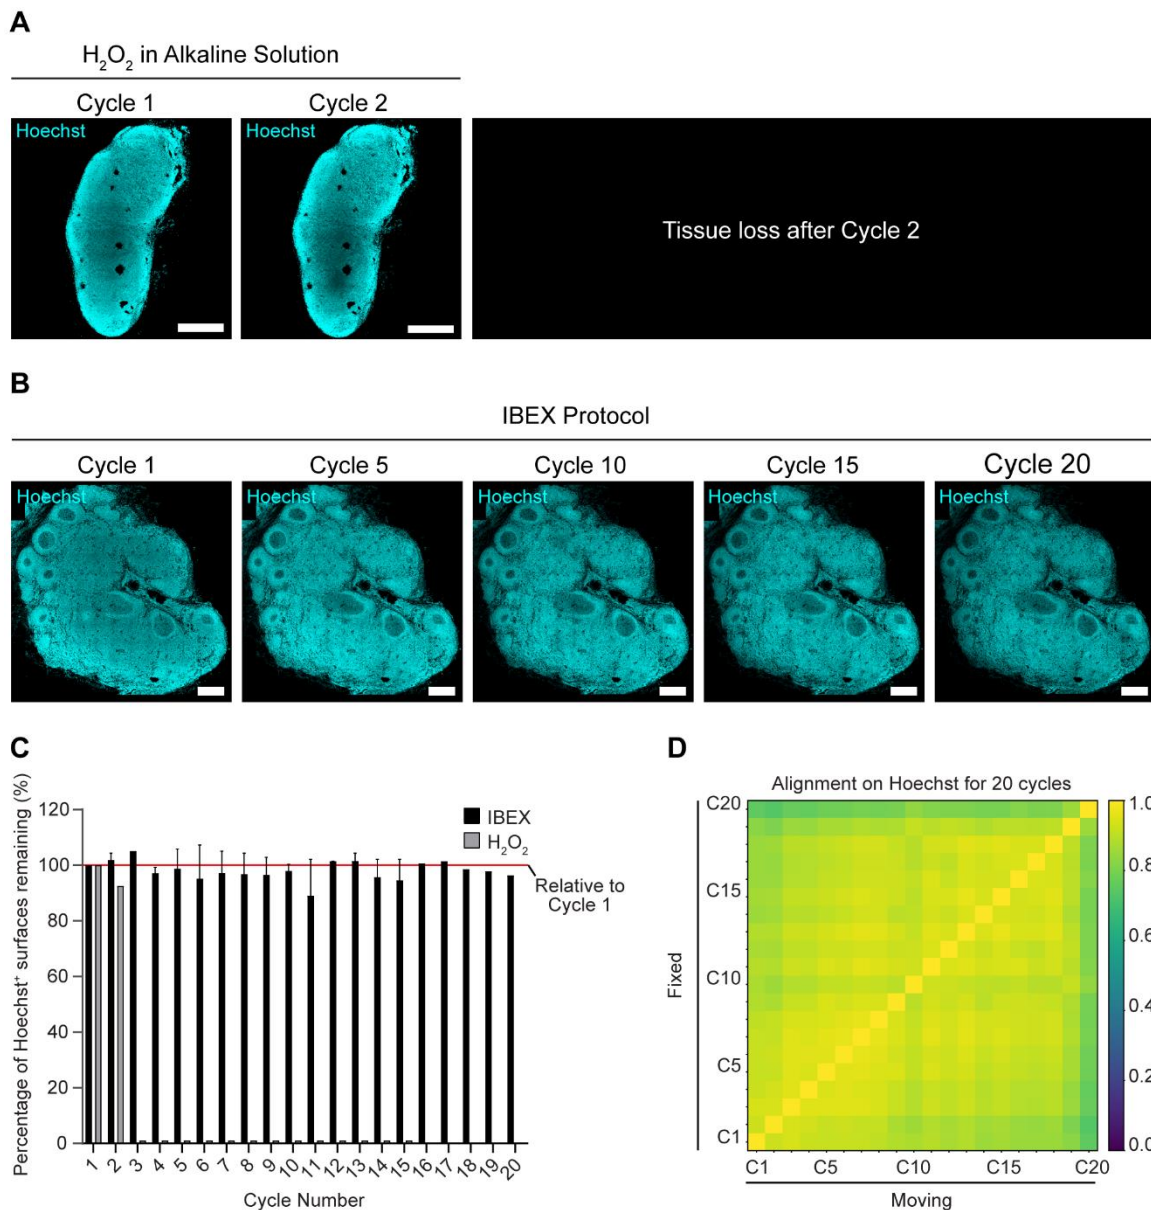

277

278 **Figure S1. IBEX protocol preserves tissue integrity over high cycle number.**

279 (A) Confocal images of mouse inguinal LN iteratively imaged using  $H_2O_2$  in alkaline solution.  
 280 Tissues lifted after 2 cycles and could not be imaged as a comparison. Scale bar corresponds to  
 281 500  $\mu m$ . (B) Confocal images of human mesenteric LN iteratively imaged using IBEX protocol for  
 282 20 cycles. Scale bar corresponds to 500  $\mu m$ . (C) Quantification of percentage of Hoechst+ surfaces  
 283 remaining per cycle relative to the number of surfaces present in cycle 1. Red line is reflective of  
 284 no tissue loss. Data are pooled from 2 similar experiments: a 15 cycle mouse inguinal LN and a 20  
 285 cycle human mesenteric LN. Shown is the mean  $\pm$  SEM. (D) Cross correlation similarity matrix after  
 286 alignment with Hoechst across 20 cycle experiment shown in B.

287

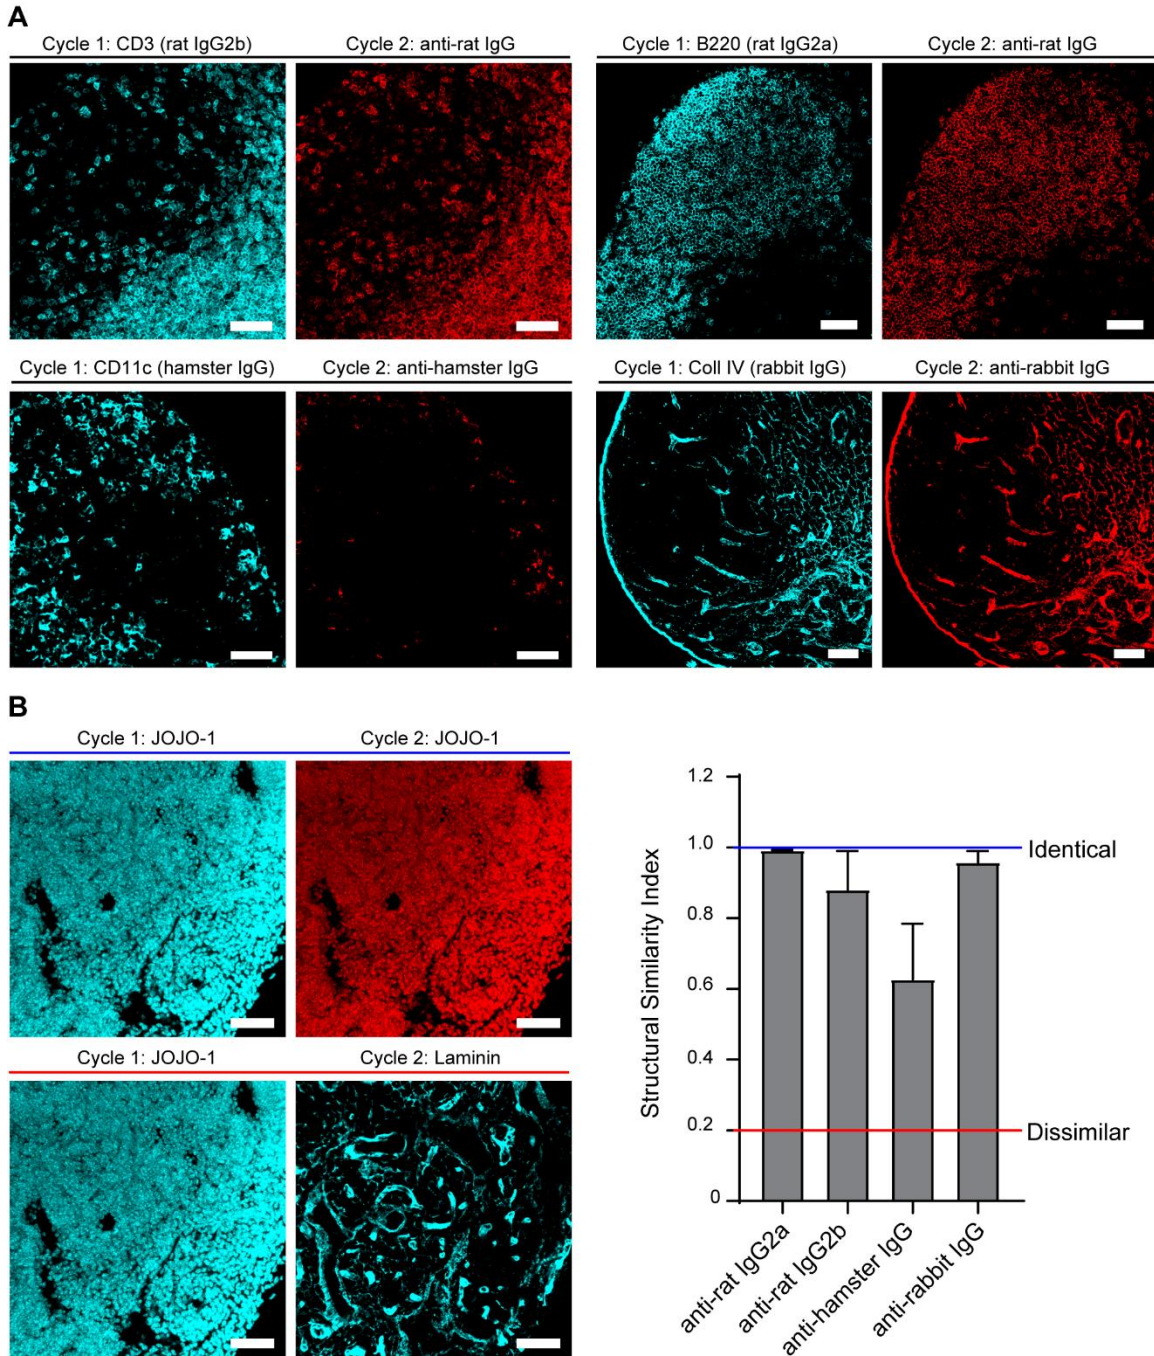

288

289 **Figure S2. LiBH<sub>4</sub> primarily acts by bleaching fluorophores and not stripping antibodies.**

290 Popliteal LN sections were stained with primary antibodies directed against various antigens,  
 291 bleached with LiBH<sub>4</sub>, and then labeled with secondary antibodies directed against the primary  
 292 antibody isotype. (A) Confocal images of murine LN sections depicting the level of signal present  
 293 with the primary antibodies as compared to an appropriate secondary antibody after IBEX protocol.  
 294 (B) Bar graph summarizing the level of similarity between images captured before and after LiBH<sub>4</sub>  
 295 treatment. Red line represents dissimilar images (Cycle 1 JOJO-1 versus Cycle 1 Laminin) and  
 296 blue line denotes highly similar images (Cycle 1 JOJO-1 vs Cycle 2 JOJO-1). Data representative  
 297 of 5 similar experiments. Shown is the mean ± SEM. Scale bar represents 50 μm.

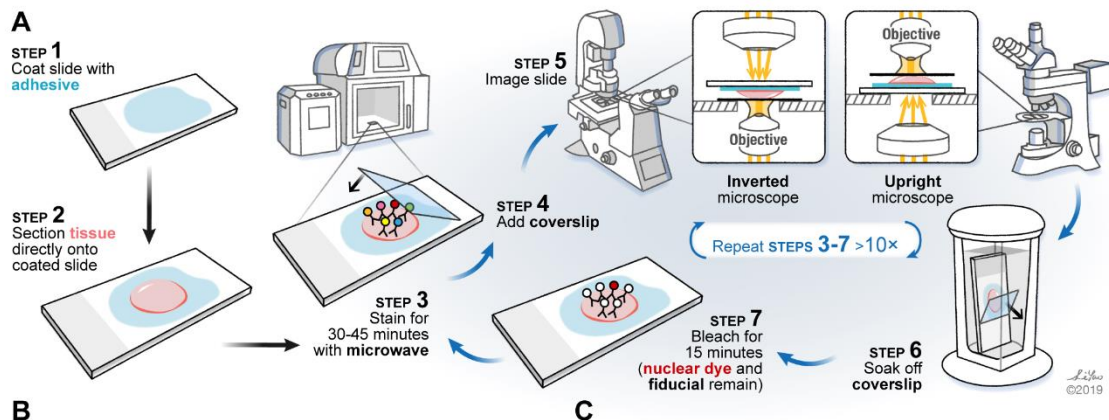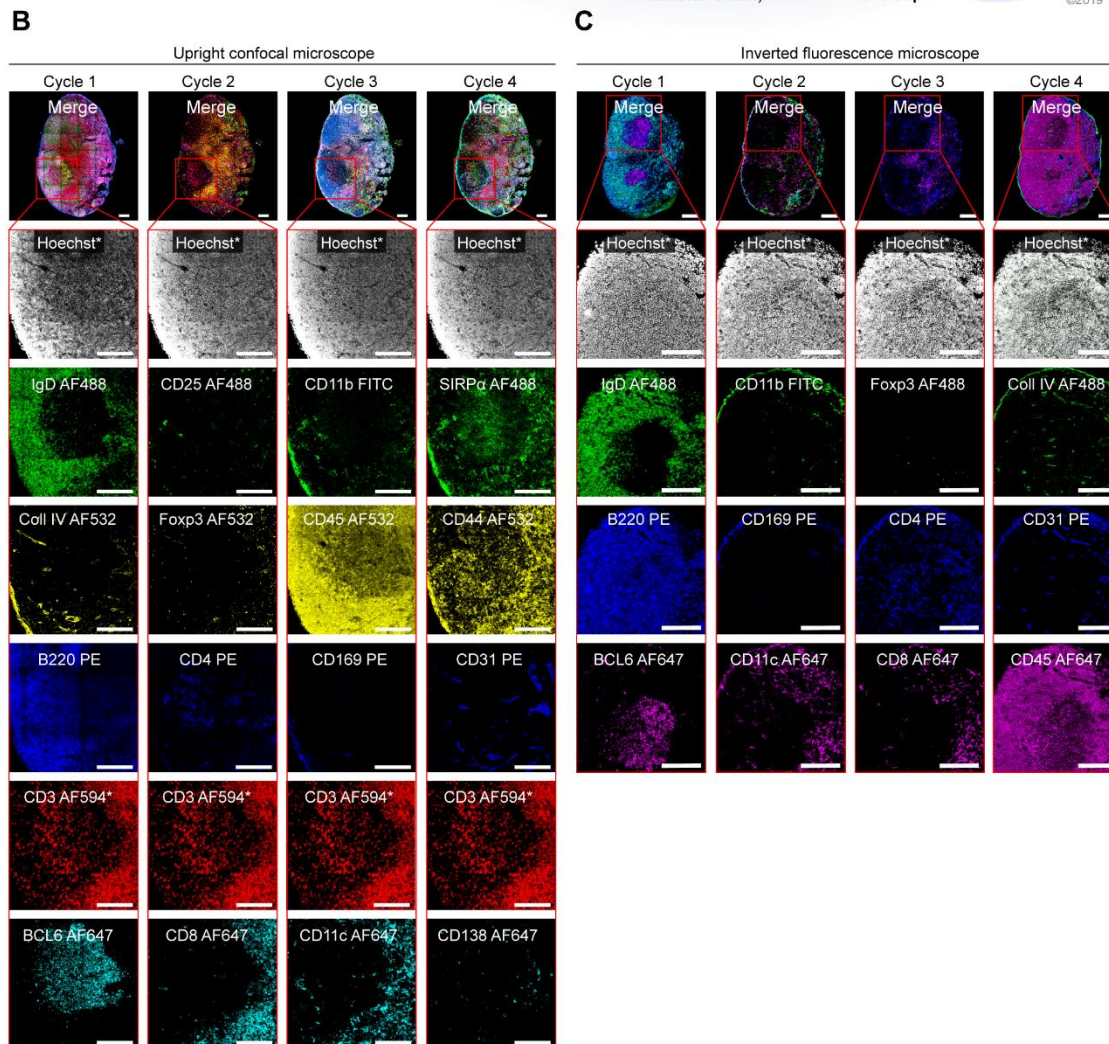

298 \*Fiducials: Hoechst and CD3 AF594, scale bar 150 μm

299 **Figure S3. IBEX can be easily adapted to other microscope configurations.**

300 (A) Schematic depicting IBEX protocol using an inverted or upright microscope. (B) Confocal  
 301 images of popliteal LNs from SRBC-immunized mice. 30 μm tissue sections were labeled with 4  
 302 separate 6 parameter imaging panels. The nuclear dye Hoechst and membrane label CD3 AF594  
 303 were present throughout cycles 1-4 and served as fiducials. Top panels are a merge of all channels

304 for each cycle except for Hoechst. Scale bar represents 150  $\mu\text{m}$ . Confocal images were acquired  
305 by an upright confocal microscope. (C) 5  $\mu\text{m}$  sections from popliteal LNs from SRBC-immunized  
306 mice were visualized using an inverted epifluorescence microscope. Tissue sections were labeled  
307 with 4 separate 4 parameter imaging panels with Hoechst serving as a fiducial for cycles 1-4. Scale  
308 bar represents 150  $\mu\text{m}$ .

309

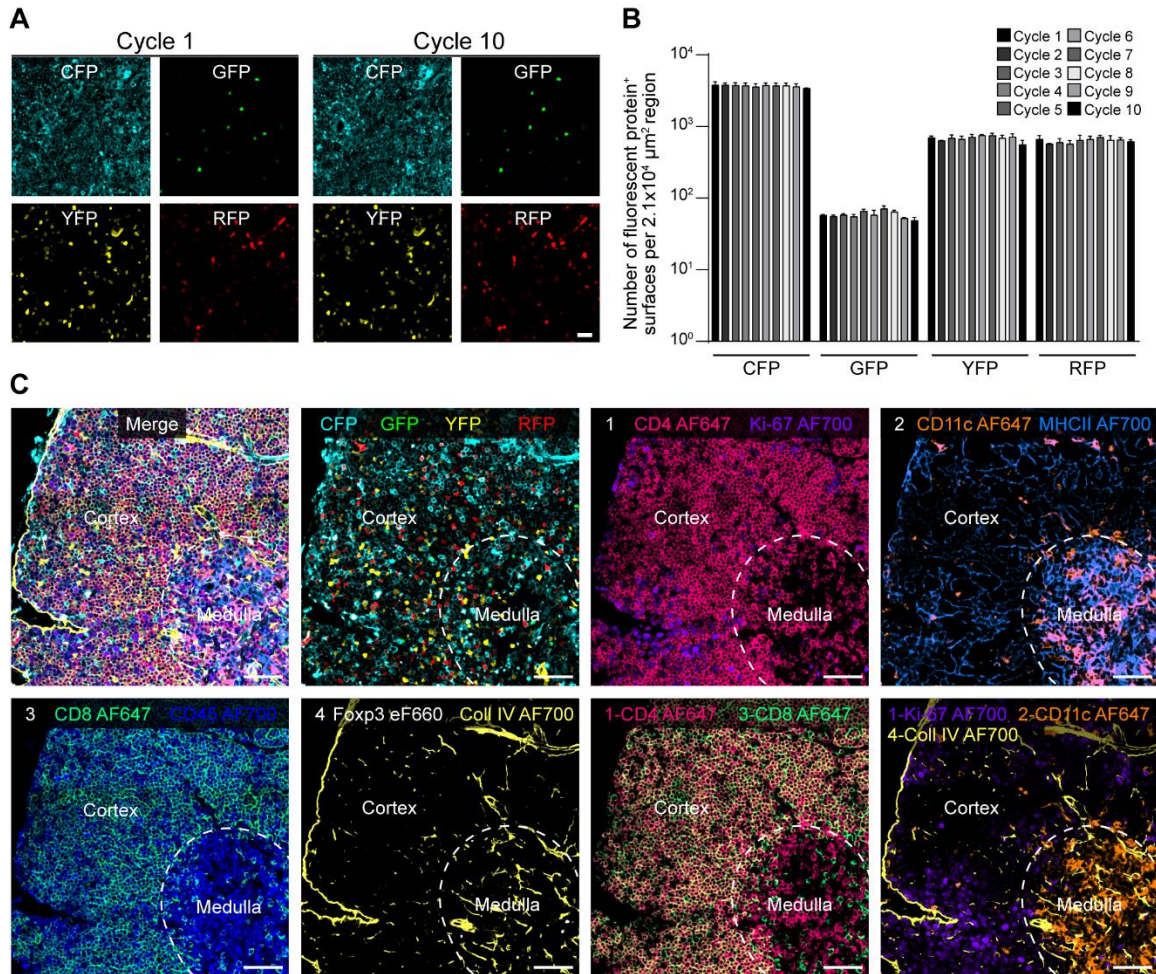

310

311 **Figure S4. Fluorescent proteins are not bleached with IBEX protocol.**

312 Fluorescent Confetti animals were injected i.p. with tamoxifen on day 0 and day 2 to induce the  
 313 expression of the following fluorescent proteins: membrane CFP, nuclear GFP, and cytoplasmic  
 314 YFP and RFP. On day 4, tissues were collected and processed for confocal microscopy. (A)  
 315 Example images of signal from fluorescent proteins at Cycle 1 (no LiBH<sub>4</sub>) and Cycle 10 (after 9  
 316 rounds of LiBH<sub>4</sub> bleaching). (B) Quantification of the number of fluorescent protein+ surfaces per  
 317  $2.1 \times 10^4 \mu\text{m}^2$  region of interest from 2 independent experiments. Shown is the mean  $\pm$  SEM. (C)  
 318 Four cycles of IBEX were applied to 30  $\mu\text{m}$  sections of thymus tissue. AF647 and AF700 conjugated  
 319 antibodies were used to stain immune and structural markers in the tissue. Representative images  
 320 showing the compatibility of IBEX with transgenic animals expressing fluorescent proteins. Data  
 321 are representative of 2 independent experiments. For A and C, images represent a single z slice  
 322 and scale bar corresponds to 25  $\mu\text{m}$  (A) or 50  $\mu\text{m}$  (B).

323

324

325

326

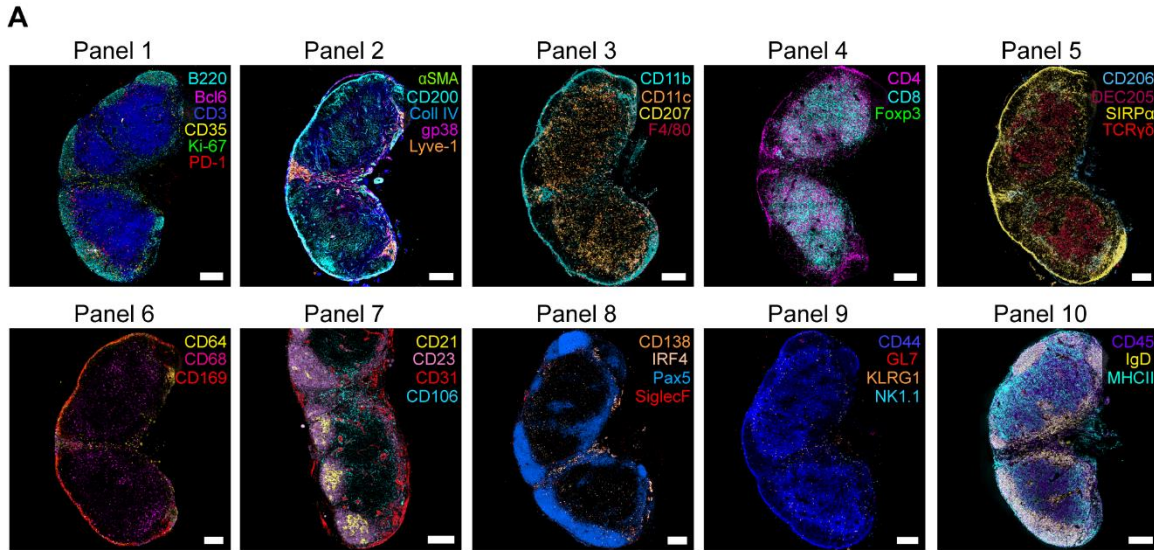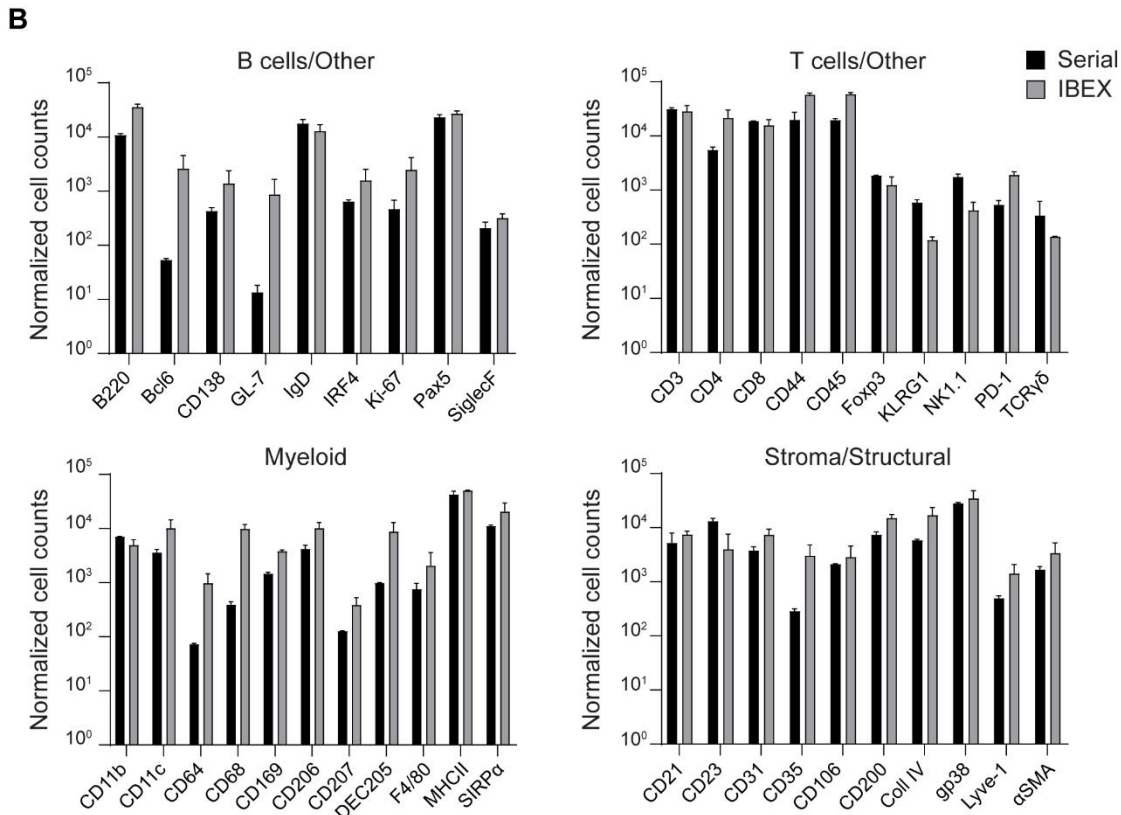

327

328 **Figure S5. Comparable staining observed by serial and iterative immunofluorescence**  
 329 **methods.**

330 (A) Confocal images of inguinal LNs (iLNs) from SRBC-immunized mice. Serial sections were  
 331 stained with the same panels used for the 10 cycle 41 parameter IBEX experiments described in  
 332 Fig. 4A. Scale bar is 200 μm. (B) Cells were segmented on the nuclear marker JOJO-1 and the  
 333 number of surfaces positive for each marker were quantified from images acquired serially as in A  
 334 or iteratively via IBEX method. Data are from 2-3 LNs per group with 2 immunized iLNs for serial

335 method and 1 naïve pLN, 1 immunized pLN, and 1 immunized axillary LN (aLN) for IBEX method.  
336 Shown is the mean  $\pm$  SEM. See Movie S7.

337

338

339

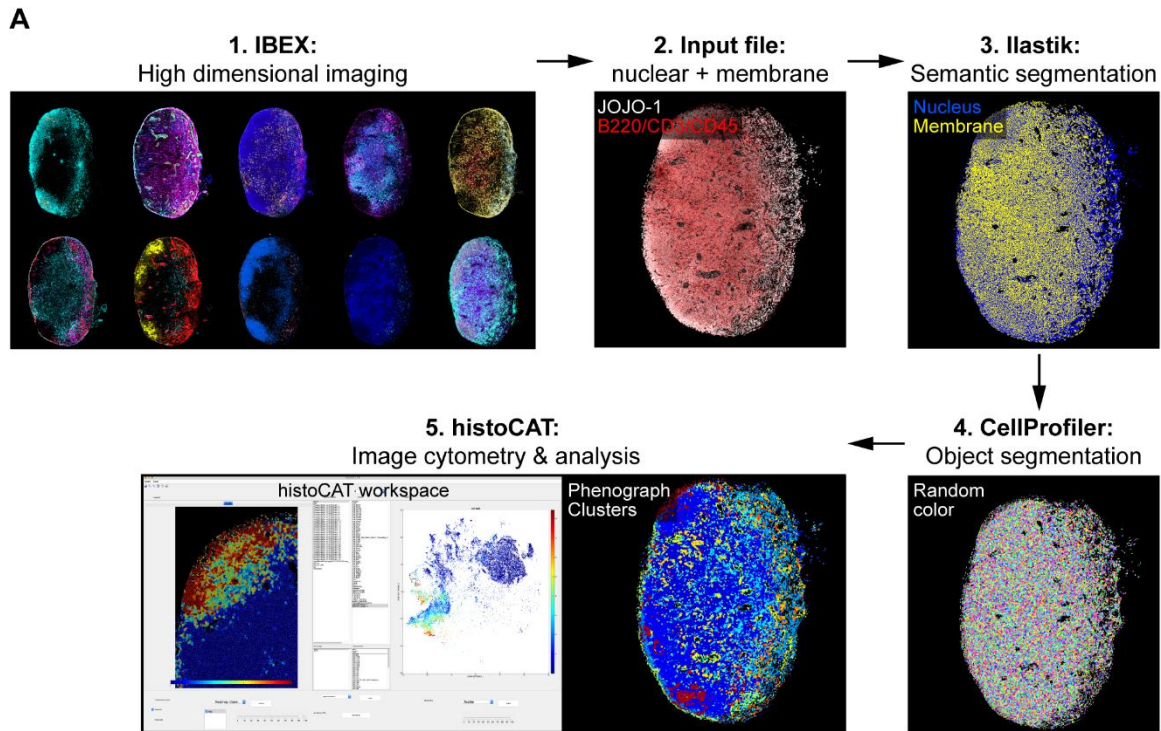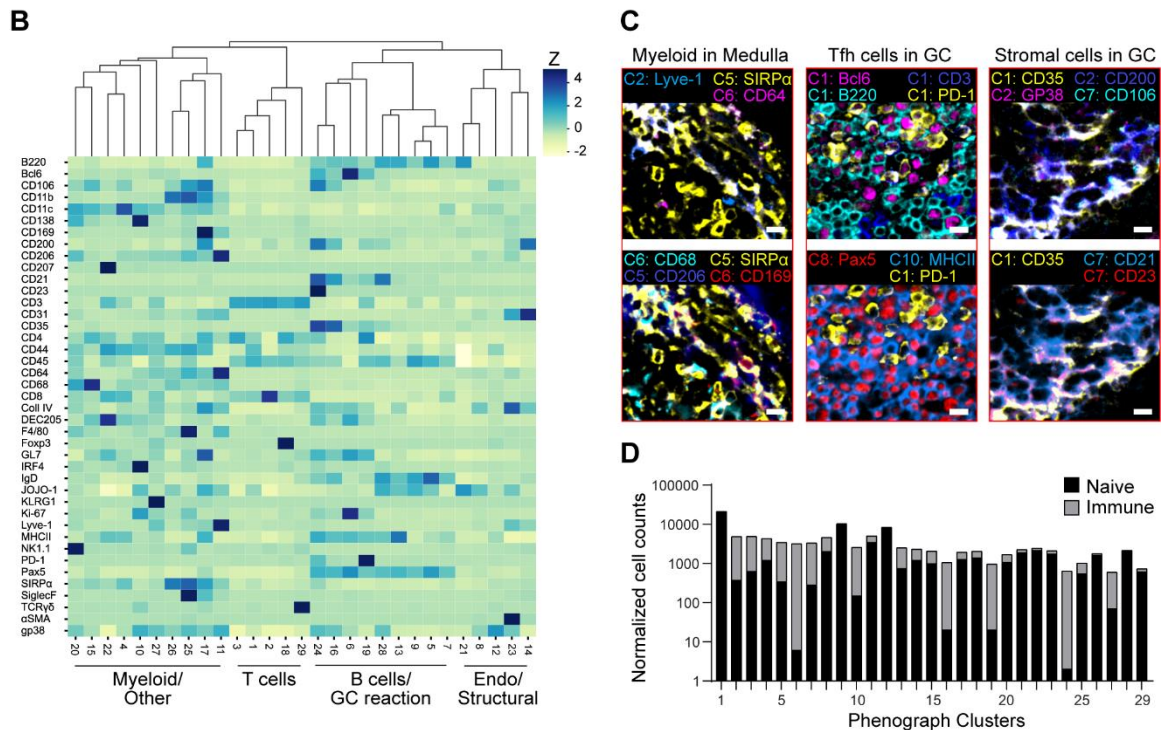

340

341 **Figure S6. Data visualization and quantification with histoCAT.**

342 (A) histoCAT workflow for image analysis. Step 1: High dimensional imaging of mouse LNs using  
 343 IBEX method. Step 2: Nuclei were defined by JOJO-1 and membranes were generated by  
 344 combining B220, CD3, and CD45 into one composite channel. Step 3: Semantic segmentation was  
 345 performed using Ilastik. Step 4: Objects were further segmented using CellProfiler. Each



346 segmented cell is randomly colored and projected back onto original x-y coordinates. Step 5: Data  
347 visualization and analysis with histoCAT. (B) Marker expression heatmap for the phenotypes  
348 identified by PhenoGraph clustering in histoCAT using segmented cells from naïve (n = 32,091)  
349 and SRBC-immunized mouse LNs (n = 80,355). The heatmap displays relative expression levels  
350 based on Z-score normalized marker intensity values, and single cells are hierarchically clustered  
351 within each phenotype group. Numbers at the bottom of the heatmap indicate corresponding  
352 PhenoGraph cluster IDs with labels corresponding to manually assigned cell populations.  
353 Endothelial (Endo). (C) Example images of myeloid, Tfh, and stromal cell populations identified by  
354 histoCAT PhenoGraph clustering from an immunized mouse LN. Scale bar corresponds to 10  $\mu\text{m}$ .  
355 (D) Normalized cell counts for PhenoGraph clusters obtained from naïve and SRBC-immunized  
356 mouse LNs. Data are from one experiment and are representative of 2 similar experiments.

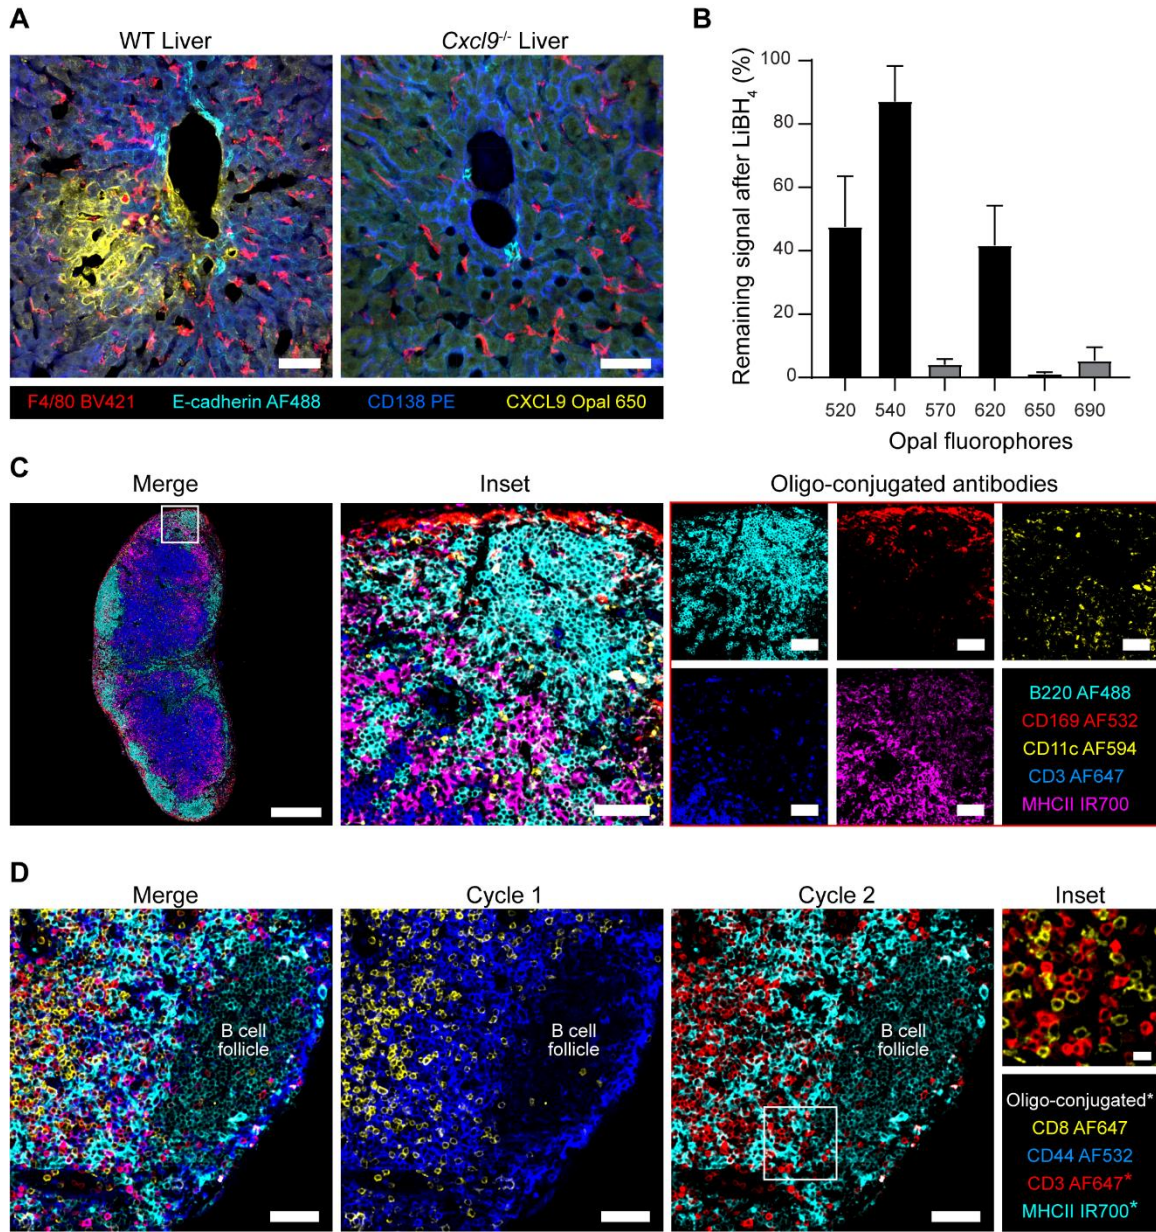

357

358 **Figure S7. Extensions of IBEX workflow to enable single cell resolution of endogenous**  
 359 **chemokines and immune populations using Opal fluorophores and oligonucleotide-**  
 360 **conjugated antibodies.**

361 (A) Detection of endogenous CXCL9 levels in fixed frozen mouse liver sections stained with  
 362 indicated markers. Scale bars 50  $\mu$ m. Confocal images are representative of 3 similar experiments.  
 363 (B) Percentage of fluorophore signal remaining after 30 minutes of LiBH<sub>4</sub> treatment. Data are  
 364 pooled from 4 experiments with iterative staining of the multiple Opal fluorophores. Shown is the  
 365 mean  $\pm$  SEM. (C) Confocal images of mouse inguinal LN labeled with 5 different oligo-conjugated  
 366 antibodies and complementary fluorescent imager strands. Scale bars (left-most panel 400  $\mu$ m or  
 367 100  $\mu$ m). (D) Representative images from a 2 cycle IBEX experiment performed on inguinal mouse  
 368 LNs where the first cycle consisted of fluorophore-conjugated antibodies and the second cycle  
 369 consisted of oligo-conjugated antibodies denoted by the asterisks. Scale bars (50  $\mu$ m, Inset 10  
 370  $\mu$ m).

## 371 Tables S1-S5

## 372 Table S1. Time and method used to bleach fluorescently conjugated antibodies and dyes.

373

| Marker      | Clone   | Conjugate    | Vendor                  | Cat No.    | Isotype                    | Dilution | Time to Bleach (Minutes) |                           |
|-------------|---------|--------------|-------------------------|------------|----------------------------|----------|--------------------------|---------------------------|
|             |         |              |                         |            |                            |          | LiBH <sub>4</sub>        | LiBH <sub>4</sub> + Light |
| β-3 Tubulin | AA10    | BV421        | BioLegend               | 657412     | Mouse IgG2a, κ             | 1:200    | -                        | <15                       |
| β-3 Tubulin | AA10    | AF532        | BioLegend               | Custom     | Mouse IgG2a, κ             | 1:100    | <15                      | -                         |
| B220        | RA3-6B2 | BV421        | BioLegend               | 103251     | Rat IgG2a, κ               | 1:400    | -                        | <15                       |
| B220        | RA3-6B2 | BV510        | BioLegend               | 103248     | Rat IgG2a, κ               | 1:300    | -                        | <15                       |
| B220        | RA3-6B2 | AF488        | BD Biosciences          | 557669     | Rat IgG2a, κ               | 1:400    | <15                      | -                         |
| B220        | RA3-6B2 | AF532        | Thermo                  | 58-0452-82 | Rat IgG2a, κ               | 1:50     | <15                      | -                         |
| B220        | RA3-6B2 | PE           | BD Biosciences          | 553090     | Rat IgG2a, κ               | 1:400    | <15                      | -                         |
| B220        | RA3-6B2 | eF570        | Thermo                  | 41-0452-80 | Rat IgG2a, κ               | 1:200    | <15                      | -                         |
| B220        | RA3-6B2 | eF615        | Thermo                  | 42-0452-82 | Rat IgG2a, κ               | 1:200    | >120                     | -                         |
| B220        | RA3-6B2 | AF647        | BioLegend               | 103226     | Rat IgG2a, κ               | 1:400    | <15                      | -                         |
| B220        | RA3-6B2 | AF700        | BioLegend               | 103232     | Rat IgG2a, κ               | 1:50     | <15                      | -                         |
| BCL2        | 100     | AF647        | BioLegend               | 658705     | Mouse IgG <sub>1</sub>     | 1:25     | <15                      | -                         |
| Bcl6        | K112-91 | AF647        | BD Biosciences          | 561525     | Mouse IgG <sub>1</sub> , κ | 1:50     | <15                      | -                         |
| CD1c        | L161    | PE           | BioLegend               | 331506     | Mouse IgG <sub>1</sub> , κ | 1:50     | <15                      | -                         |
| CD1d        | 1B1     | PE           | BD Biosciences          | 553846     | Rat IgG2b, κ               | 1:100    | <15                      | -                         |
| CD3         | 17A2    | BV421        | BioLegend               | 100228     | Rat IgG2b, κ               | 1:400    | -                        | <15                       |
| CD3         | 17A2    | BV510        | BioLegend               | 100234     | Rat IgG2b, κ               | 1:50     | -                        | <15                       |
| CD3         | 17A2    | AF488        | BioLegend               | 100210     | Rat IgG2b, κ               | 1:200    | <15                      | -                         |
| CD3         | 17A2    | AF532        | Thermo                  | 58-0032-80 | Rat IgG2b, κ               | 1:50     | <15                      | -                         |
| CD3         | 17A2    | PE           | BioLegend               | 100205     | Rat IgG2b, κ               | 1:200    | <15                      | -                         |
| CD3         | 17A2    | AF594        | BioLegend               | 100240     | Rat IgG2b, κ               | 1:400    | >120                     | -                         |
| CD3         | 17A2    | AF647        | BD Biosciences          | 557869     | Rat IgG2b, κ               | 1:400    | <15                      | -                         |
| CD3         | UCHT1   | AF532        | Thermo                  | 58-0038-42 | Mouse IgG <sub>1</sub> , κ | 1:50     | <15                      | -                         |
| CD3         | UCHT1   | AF594        | BioLegend               | 300446     | Mouse IgG <sub>1</sub>     | 1:200    | >120                     | -                         |
| CD4         | GK1.5   | BV421        | BioLegend               | 100443     | Rat IgG2b, κ               | 1:200    | -                        | <15                       |
| CD4         | GK1.5   | BV510        | BioLegend               | 100449     | Rat IgG2b, κ               | 1:50     | -                        | <15                       |
| CD4         | GK1.5   | PE           | BD Biosciences          | 553730     | Rat IgG2b, κ               | 1:200    | <15                      | -                         |
| CD4         | GK1.5   | AF594        | BioLegend               | 100446     | Rat IgG2b, κ               | 1:200    | >120                     | -                         |
| CD4         | RM4-5   | AF488        | BD Biosciences          | 557667     | Rat IgG2a, κ               | 1:100    | <15                      | -                         |
| CD4         | RM4-5   | AF532        | Thermo                  | 58-0042-80 | Rat IgG2a, κ               | 1:50     | <15                      | -                         |
| CD4         | RM4-5   | eF570        | Thermo                  | 41-0042-82 | Rat IgG2a, κ               | 1:100    | <15                      | -                         |
| CD4         | RPA-T4  | AF532        | Thermo                  | 58-0049-42 | Mouse IgG <sub>1</sub> , κ | 1:25     | <15                      | -                         |
| CD4         | RPA-T4  | AF700        | BioLegend               | 300526     | Mouse IgG <sub>1</sub> , κ | 1:25     | <15                      | -                         |
| CD8         | 53-6.7  | BV421        | BioLegend               | 100738     | Rat IgG2a, κ               | 1:200    | -                        | <15                       |
| CD8         | 53-6.7  | BV510        | BioLegend               | 100752     | Rat IgG2a, κ               | 1:200    | -                        | <15                       |
| CD8         | 53-6.7  | AF488        | BioLegend               | 100723     | Rat IgG2a, κ               | 1:200    | <15                      | -                         |
| CD8         | 53-6.7  | PE           | BD Biosciences          | 553032     | Rat IgG2a, κ               | 1:400    | <15                      | -                         |
| CD8         | 53-6.7  | AF594        | BioLegend               | 100758     | Rat IgG2a, κ               | 1:200    | >120                     | -                         |
| CD8         | 53-6.7  | AF647        | BioLegend               | 100724     | Rat IgG2a, κ               | 1:200    | <15                      | -                         |
| CD8         | SK1     | AF488        | BioLegend               | 344716     | Mouse IgG <sub>1</sub> , κ | 1:50     | <15                      | -                         |
| CD10        | FR4D11  | PE           | Caprico Biotechnologies | 103926     | Mouse IgG <sub>1</sub> , κ | 1:50     | <15                      | -                         |
| CD11b       | 5C6     | FITC         | Bio-Rad                 | MCA711F    | Rat IgG2b                  | 1:100    | <15                      | -                         |
| CD11b       | 5C6     | PE           | Bio-Rad                 | MCA711PE   | Rat IgG2b                  | 1:100    | <15                      | -                         |
| CD11b       | M1/70   | AF488        | BioLegend               | 101217     | Rat IgG2b, κ               | 1:100    | <15                      | -                         |
| CD11c       | N418    | AF488        | Thermo                  | MCD11c20   | Hamster IgG                | 1:50     | <15                      | -                         |
| CD11c       | N418    | AF594        | BioLegend               | 117346     | Hamster IgG                | 1:50     | >120                     | -                         |
| CD11c       | N418    | AF647        | BioLegend               | 117312     | Hamster IgG                | 1:100    | <15                      | -                         |
| CD11c       | B-Ly6   | AF700        | BD Biosciences          | 561352     | Mouse IgG <sub>1</sub> , κ | 1:25     | <15                      | -                         |
| CD20        | L26     | AF488        | Thermo                  | 53-0202-82 | Mouse IgG2b, κ             | 1:200    | <15                      | -                         |
| CD21        | 7E9     | Pacific Blue | BioLegend               | 123413     | Rat IgG2a, κ               | 1:200    | <15                      | -                         |
| CD21        | Bu32    | AF532        | BioLegend               | Custom     | Mouse IgG <sub>1</sub> , κ | 1:400    | <15                      | -                         |
| CD23        | B3B4    | AF647        | BioLegend               | 101611     | Rat IgG2a, κ               | 1:50     | <15                      | -                         |
| CD23        | EBVCS-5 | AF532        | BioLegend               | NA, Custom | Mouse IgG <sub>1</sub> , κ | 1:25     | <15                      | -                         |
| CD25        | PC61.5  | AF488        | Thermo                  | 53-0251-82 | Rat IgG1, λ                | 1:50     | <15                      | -                         |
| CD25        | M-A251  | AF647        | BioLegend               | 356127     | Mouse IgG <sub>1</sub> , κ | 1:50     | <15                      | -                         |

|             |           |              |                         |                           |                            |       |      |     |
|-------------|-----------|--------------|-------------------------|---------------------------|----------------------------|-------|------|-----|
| CD31        | MEC13.3   | AF488        | BioLegend               | 102514                    | Rat IgG2a, κ               | 1:100 | <15  | -   |
| CD31        | MEC13.3   | PE           | BD Biosciences          | 553373                    | Rat IgG2a, κ               | 1:200 | <15  | -   |
| CD31        | MEC13.3   | AF594        | BioLegend               | 102520                    | Rat IgG2a, κ               | 1:100 | >120 | -   |
| CD31        | MEC13.3   | AF647        | BioLegend               | 102516                    | Rat IgG2a, κ               | 1:100 | <15  | -   |
| CD31        | WM59      | AF700        | BioLegend               | 303133                    | Mouse IgG <sub>1</sub> , κ | 1:25  | <15  | -   |
| CD34        | QBEND/10  | PE           | Thermo                  | MAI-10205                 | Mouse IgG <sub>1</sub>     | 1:50  | <15  | -   |
| CD35        | 8C12      | BV510        | BD Biosciences          | 740132                    | Rat IgG2a, κ               | 1:600 | -    | <15 |
| CD35        | E11       | PE           | BioLegend               | 333406                    | Mouse IgG <sub>1</sub> , κ | 1:800 | <15  | -   |
| CD38        | HIT2      | AF700        | BioLegend               | 303524                    | Mouse IgG <sub>1</sub> , κ | 1:25  | <15  | -   |
| CD39        | A1        | PE           | BioLegend               | 328208                    | Mouse IgG <sub>1</sub> , κ | 1:50  | <15  | -   |
| CD44        | IM7       | AF488        | BioLegend               | 103016                    | Rat IgG2b, κ               | 1:100 | <15  | -   |
| CD44        | IM7       | AF532        | BioLegend               | Custom                    | Rat IgG2b, κ               | 1:100 | <15  | -   |
| CD44        | IM7       | AF647        | BioLegend               | 103018                    | Rat IgG2b, κ               | 1:100 | <15  | -   |
| CD44        | IM7       | AF700        | BioLegend               | 103026                    | Rat IgG2b, κ               | 1:50  | <15  | -   |
| CD45        | 30-F11    | BV421        | BioLegend               | 103134                    | Rat IgG2b, κ               | 1:100 | -    | <15 |
| CD45        | 30-F11    | BV510        | BioLegend               | 103138                    | Rat IgG2b, κ               | 1:100 | -    | <15 |
| CD45        | 30-F11    | AF488        | BioLegend               | 103122                    | Rat IgG2b, κ               | 1:200 | <15  | -   |
| CD45        | 30-F11    | AF532        | Thermo                  | 58-0451-82                | Rat IgG2b, κ               | 1:200 | <15  | -   |
| CD45        | 30-F11    | AF647        | BioLegend               | 103124                    | Rat IgG2b, κ               | 1:400 | <15  | -   |
| CD45        | 30-F11    | AF700        | BioLegend               | 103128                    | Rat IgG2b, κ               | 1:50  | <15  | -   |
| CD45        | HI30      | AF532        | Thermo                  | 58-0459-41                | Mouse IgG <sub>1</sub> , κ | 1:50  | <15  | -   |
| CD45        | F10-89-4  | PE/iFluor594 | Caprico Biotechnologies | 1016185                   | Mouse IgG2a, κ             | 1:50  | <15  | -   |
| CD49a       | TS2/7     | PE           | BioLegend               | 328304                    | Mouse IgG <sub>1</sub> , κ | 1:50  | <15  | -   |
| CD54        | HA58      | AF647        | BioLegend               | 353114                    | Mouse IgG <sub>1</sub> , κ | 1:50  | <15  | -   |
| CD64        | X54-5/7.1 | AF647        | BioLegend               | 139322                    | Mouse IgG <sub>1</sub> , κ | 1:50  | <15  | -   |
| CD66b       | G10F5     | AF647        | BioLegend               | 305110                    | Mouse IgM, κ               | 1:25  | <15  | -   |
| CD68        | FA-11     | BV421        | BioLegend               | 137017                    | Rat IgG2a                  | 1:200 | -    | <15 |
| CD68        | FA-11     | AF488        | BioLegend               | 137011                    | Rat IgG2a                  | 1:50  | <15  | -   |
| CD68        | KP1       | AF647        | Santa Cruz              | sc-200060                 | Mouse IgG <sub>1</sub> , κ | 1:100 | <15  | -   |
| CD69        | -         | None         | R&D                     | AF2386                    | Goat IgG                   | 1:50  | -    | -   |
| CD69        | H1.2F3    | PE           | BioLegend               | 104508                    | Hamster IgG                | 1:50  | <15  | -   |
| CD69        | FN50      | AF647        | BioLegend               | 310918                    | Mouse IgG <sub>1</sub> , κ | 1:100 | <15  | -   |
| CD94        | DX22      | PE           | BioLegend               | 305506                    | Mouse IgG <sub>1</sub> , κ | 1:50  | <15  | -   |
| CD103       | 2E7       | AF488        | BioLegend               | 121407                    | Hamster IgG                | 1:100 | <15  | -   |
| CD106       | 429       | AF488        | BioLegend               | 105710                    | Rat IgG2a, κ               | 1:50  | <15  | -   |
| CD106       | 429       | eF660        | Thermo                  | 50-1061-80                | Rat IgG2a, κ               | 1:50  | <15  | -   |
| CD106       | STA       | PE           | BioLegend               | 305806                    | Mouse IgG <sub>1</sub> , κ | 1:50  | <15  | -   |
| CD117       | 2B8       | BV421        | BioLegend               | 105827                    | Rat IgG2b, κ               | 1:50  | -    | <15 |
| CD117       | 104D2     | AF488        | BioLegend               | 313234                    | Mouse IgG <sub>1</sub> , κ | 1:50  | <15  | -   |
| CD138       | 281-2     | BV421        | BD Biosciences          | 562610                    | Rat IgG2a, κ               | 1:50  | -    | <15 |
| CD138       | 281-2     | AF647        | BioLegend               | 142526                    | Rat IgG2a, κ               | 1:50  | <15  | -   |
| CD138       | MI15      | PE           | BioLegend               | 356504                    | Mouse IgG <sub>1</sub> , κ | 1:200 | <15  | -   |
| CD138       | MI15      | AF647        | BioLegend               | 356523                    | Mouse IgG <sub>1</sub> , κ | 1:200 | <15  | -   |
| CD163       | GH1/61    | AF647        | BioLegend               | 333620                    | Mouse IgG <sub>1</sub> , κ | 1:100 | <15  | -   |
| CD166       | EPR2759   | AF488        | AbCAM                   | Ab197543                  | Rabbit mAb                 | 1:100 | <15  | -   |
| CD169       | 3D6.112   | FITC         | Bio-Rad                 | MCA884F                   | Rat IgG2a, κ               | 1:50  | <15  | -   |
| CD169       | 3D6.112   | PE           | Biolegend               | 142404                    | Rat IgG2a, κ               | 1:300 | <15  | -   |
| CD169       | 3D6.112   | AF594        | BioLegend               | 142416                    | Rat IgG2a, κ               | 1:100 | >120 | -   |
| CD200       | Ox-90     | BV421        | BD Biosciences          | 565547                    | Rat IgG2a, κ               | 1:100 | -    | <15 |
| CD206       | C068C2    | BV421        | BioLegend               | 141717                    | Rat IgG2a, κ               | 1:100 | -    | <15 |
| CD207       | eBioL31   | PE           | Thermo                  | 12-2075-80                | Rat IgG2a                  | 1:50  | <15  | -   |
| Clec9a      | 8F9       | AF488        | BioLegend               | Custom                    | Mouse IgG2a, κ             | 1:25  | <15  | -   |
| Collagen IV | -         | None         | AbCAM                   | 19808                     | Rabbit IgG                 | 1:200 | -    | -   |
| Collagen IV | -         | None         | AbCAM                   | Ab6586                    | Rabbit IgG                 | 1:200 | -    | -   |
| CXCL12      | 79018     | AF532        | R&D                     | MAB350-500 (Unconjugated) | Mouse IgG <sub>1</sub>     | 1:25  | <15  | -   |
| CXCL13      | -         | AF532        | R&D                     | AF801 (Unconjugated)      | Goat IgG                   | 1:25  | <15  | -   |
| CXCR6       | 221002    | AF647        | Novus                   | FAB2145R                  | Rat IgG2b                  | 1:50  | <15  | -   |
| Cytokeratin | C-11      | AF647        | BioLegend               | 628604                    | Mouse IgG <sub>1</sub> , κ | 1:200 | <15  | -   |
| Cytokeratin | AE1/AE3   | eF660        | Thermo                  | 50-9003-82                | Mouse IgG <sub>1</sub>     | 1:100 | <15  | -   |
| DCAMKL1     | -         | None         | AbCAM                   | Ab37994                   | Rabbit IgG                 | 1:50  | -    | -   |

|                      |              |             |                  |                       |                              |          |      |     |
|----------------------|--------------|-------------|------------------|-----------------------|------------------------------|----------|------|-----|
| DC-SIGN              | 9E9A8        | AF647       | BioLegend        | 330112                | Mouse IgG2a, κ               | 1:50     | <15  | -   |
| DEC205               | NLDC-145     | AF647       | BioLegend        | 138204                | Rat IgG2a, κ                 | 1:50     | <15  | -   |
| Desmin               | -            | None        | AbCAM            | Ab15200               | Rabbit IgG                   | 1:200    | -    | -   |
| Desmin               | Y66          | AF488       | AbCAM            | Ab185033              | Rabbit IgG                   | 1:200    | <15  | -   |
| E-cadherin           | DECMA-1      | AF647       | BioLegend        | 147308                | Rat IgG1, κ                  | 1:100    | <15  | -   |
| EpCAM                | G8.8         | BV510       | BD Biosciences   | 563216                | Rat IgG2a, κ                 | 1:100    | -    | <15 |
| EpCAM                | G8.8         | AF594       | BioLegend        | 118222                | Rat IgG2a, κ                 | 1:400    | >120 | -   |
| EpCAM                | G8.8         | AF647       | BioLegend        | 118212                | Rat IgG2a, κ                 | 1:200    | <15  | -   |
| EpCAM                | 9C4          | AF594       | BioLegend        | 324228                | Mouse IgG2b, κ               | 1:500    | >120 | -   |
| EpCAM                | 9C4          | AF647       | BioLegend        | 324212                | Mouse IgG2b, κ               | 1:100    | <15  | -   |
| F4/80                | BM8          | BV421       | BioLegend        | 123132                | Rat IgG2a, κ                 | 1:50     | -    | <15 |
| F4/80                | BM8          | PE          | Thermo           | 12-4801-82            | Rat IgG2a, κ                 | 1:100    | <15  | -   |
| F4/80                | BM8          | AF647       | BioLegend        | 123122                | Rat IgG2a, κ                 | 1:50     | <15  | -   |
| F4/80                | BM8          | AF700       | BioLegend        | 123130                | Rat IgG2a, κ                 | 1:50     | <15  | -   |
| Fibronectin          | 2F4          | AF532       | Novus            | NBP2-22113AF532       | Mouse IgG <sub>1</sub>       | 1:25     | <15  | -   |
| Foxp3                | FJK-16s      | AF488       | Thermo           | 53-5773-82            | Rat IgG2a, κ                 | 1:50     | <15  | -   |
| Foxp3                | FJK-16s      | AF532       | Thermo           | 58-5773-82            | Rat IgG2a, κ                 | 1:50     | <15  | -   |
| Foxp3                | FJK-16s      | PE          | Thermo           | 12-5773-82            | Rat IgG2a, κ                 | 1:50     | <15  | -   |
| Foxp3                | FJK-16s      | eF570       | Thermo           | 41-5773-82            | Rat IgG2a, κ                 | 1:50     | <15  | -   |
| Foxp3                | FJK-16s      | eF660       | Thermo           | 50-5773-82            | Rat IgG2a, κ                 | 1:50     | <15  | -   |
| FOXP3                | 236A/E7      | eF570       | Thermo           | 41-4777-82            | Mouse IgG <sub>1</sub> , κ   | 1:50     | <15  | -   |
| GL-7                 | GL7          | PE          | BD Biosciences   | 561530                | Rat IgM, κ                   | 1:100    | <15  | -   |
| Glutamine synthetase | -            | None        | AbCAM            | Ab49873               | Rabbit IgG                   | 1:200    | -    | -   |
| gp38                 | 8.1.1        | AF488       | BioLegend        | 127405                | Hamster IgG                  | 1:50     | <15  | -   |
| HLA-DR               | L243         | AF488       | BioLegend        | 307619                | Mouse IgG2a, κ               | 1:200    | <15  | -   |
| Hoechst              | -            | -           | Biotium          | 40046                 | -                            | 1:5,000  | -    | -   |
| ICOS                 | CS98.4A      | AF488       | BioLegend        | 313514                | Hamster IgG                  | 1:25     | <15  | -   |
| IgA                  | -            | AF555       | Southern Biotech | 1040-32               | Goat IgG                     | 1:500    | <15  | -   |
| IgA1                 | B3506B4      | AF647       | SouthernBiotech  | 9130-31               | Mouse IgG <sub>1</sub> , κ   | 1:500    | <15  | -   |
| IgA2                 | A9604D2      | AF488       | SouthernBiotech  | 9140-30               | Mouse IgG <sub>1</sub> , κ   | 1:500    | <15  | -   |
| IgD                  | 11-26c.2a    | AF488       | BioLegend        | 405718                | Rat IgG2a, κ                 | 1:400    | <15  | -   |
| IgD                  | 11-26c.2a    | AF594       | BioLegend        | 405740                | Rat IgG2a, κ                 | 1:400    | >120 | -   |
| IgD                  | 11-26c.2a    | AF700       | BioLegend        | 405729                | Rat IgG2a, κ                 | 1:50     | <15  | -   |
| IgD                  | IA6-2        | AF488       | BioLegend        | 348216                | Mouse IgG2a, κ               | 1:25     | <15  | -   |
| IgM                  | EPR5539-65-4 | AF647       | AbCAM            | Ab200629              | Rabbit mAb                   | 1:100    | <15  | -   |
| IRF4                 | 3E4          | FITC        | Thermo           | 11-9858-82            | Rat IgG1, κ                  | 1:50     | <15  | -   |
| IRF4                 | 3E4          | PE          | Thermo           | 12-9858-82            | Rat IgG1, κ                  | 1:50     | <15  | -   |
| JOJO-1               | -            | -           | Thermo           | J11372                | -                            | 1:10,000 | -    | -   |
| Keratin 14           | Poly9060     | -           | BioLegend        | 906004                | Chicken IgY                  | 1:50     | -    | -   |
| Keratin 18           | 1G11C4       | CoraLite488 | ProteinTech      | CL488-66187           | Mouse IgG <sub>1</sub>       | 1:50     | <15  | -   |
| Ki-67                | B56          | AF488       | BD Biosciences   | 558616                | Mouse IgG <sub>1</sub> , κ   | 1:50     | <15  | -   |
| Ki-67                | B56          | AF700       | BD Biosciences   | 561277                | Mouse IgG <sub>1</sub> , κ   | 1:50     | <15  | -   |
| KLRG1                | 2F1          | AF488       | BD Biosciences   | 561619                | Hamster IgG <sub>2</sub> , κ | 1:50     | <15  | -   |
| Laminin 1 + 2        | -            | None        | AbCAM            | Ab7463                | Rabbit IgG                   | 1:100    | -    | -   |
| Lumican              | -            | AF532       | R&D              | AF2846 (Unconjugated) | Goat IgG                     | 1:50     | <15  | -   |
| Ly-6G                | 1A8          | AF488       | BioLegend        | 127626                | Rat IgG2a, κ                 | 1:50     | <15  | -   |
| Lysozyme             | -            | -           | AbCAM            | Ab2408                | Rabbit IgG                   | 1:50     | -    | -   |
| Lyve-1               | ALY7         | eF570       | Thermo           | 41-0443-82            | Rat IgG1, κ                  | 1:100    | <15  | -   |
| Lyve-1               | -            | AF532       | R&D              | AF2089 (Unconjugated) | Goat IgG                     | 1:100    | <15  | -   |
| MARCO                | -            | -           | Thermo           | PA5-64134             | Rabbit IgG                   | 1:25     | -    | -   |
| MHC-II               | M5/114.15.2  | BV421       | BioLegend        | 107631                | Rat IgG2b, κ                 | 1:400    | -    | <15 |
| MHC-II               | M5/114.15.2  | AF647       | BioLegend        | 107618                | Rat IgG2b, κ                 | 1:600    | <15  | -   |
| MHC-II               | M5/114.15.2  | AF700       | BioLegend        | 107622                | Rat IgG2b, κ                 | 1:100    | <15  | -   |
| NF-H/NF-M            | SM1-35       | AF488       | BioLegend        | 835614                | Mouse IgG <sub>1</sub> , κ   | 1:50     | <15  | -   |
| NK1.1                | PK136        | BV421       | BioLegend        | 108731                | Mouse IgG2a, κ               | 1:50     | -    | <15 |
| p53                  | PAb 240      | PE          | Novus            | NB200-103PE           | Mouse IgG <sub>1</sub> , κ   | 1:50     | <15  | -   |
| Pax5                 | 1H9          | AF647       | BioLegend        | 649704                | Rat IgG2a, κ                 | 1:100    | <15  | -   |
| PD-1                 | 29F.1A.12    | BV421       | BioLegend        | 135217                | Rat IgG2a, κ                 | 1:100    | -    | <15 |
| PD-1                 | 29F.1A.12    | PE          | BioLegend        | 135206                | Rat IgG2a, κ                 | 1:100    | <15  | -   |
| PD-1                 | EH12.2H7     | PE          | BioLegend        | 329906                | Mouse IgG <sub>1</sub> , κ   | 1:200    | <15  | -   |
| RoRyt                | AFKJS-9      | -           | Thermo           | 14-6988-82            | Rat IgG2a                    | 1:200    | -    | -   |

|                  |          |       |                |                        |                            |       |      |     |
|------------------|----------|-------|----------------|------------------------|----------------------------|-------|------|-----|
| SiglecF          | E50-2440 | PE    | BD Biosciences | 552126                 | Rat IgG2a, κ               | 1:100 | <15  | -   |
| SiglecF          | 1RN44N   | AF700 | Thermo         | 56-1702-80             | Rat IgG2a, κ               | 1:50  | <15  | -   |
| SIRPα            | P84      | AF488 | BioLegend      | 144024                 | Rat IgG1, κ                | 1:50  | <15  | -   |
| SIRPα            | P84      | AF647 | BioLegend      | 144027                 | Rat IgG1, κ                | 1:200 | <15  | -   |
| αSMA             | 1A4      | AF488 | Thermo         | 53-9760-80             | Mouse IgG2a, κ             | 1:500 | <15  | -   |
| αSMA             | 1A4      | eF660 | Thermo         | 53-9760-82             | Mouse IgG2a, κ             | 1:500 | <15  | -   |
| SPARC            | -        | AF532 | R&D            | AF941 (Unconjugated)   | Goat IgG                   | 1:50  | <15  | -   |
| TCRγδ            | GL3      | AF488 | BioLegend      | 118128                 | Hamster IgG                | 1:50  | <15  | -   |
| TCRγδ            | GL3      | PE    | BioLegend      | 118108                 | Hamster IgG                | 1:100 | <15  | -   |
| TCRγδ            | B1       | PE    | BioLegend      | 331210                 | Mouse IgG <sub>1</sub> , κ | 1:100 | <15  | -   |
| Tim-3            | 344823   | AF532 | R&D            | MAB2365 (Unconjugated) | Rat IgG2a                  | 1:25  | <15  | -   |
| Tim-4            | 21H12    | BV421 | BD Biosciences | 742773                 | Rat IgG1, κ                | 1:100 | -    | <15 |
| Tryptase         | AA1      | -     | AbCAM          | Ab2378                 | Mouse IgG <sub>1</sub>     | 1:50  | <15  | -   |
| Vα7.2            | 3C10     | AF647 | BioLegend      | 351726                 | Mouse IgG <sub>1</sub> , κ | 1:50  | <15  | -   |
| Vimentin         | O91D3    | AF532 | BioLegend      | Custom                 | Mouse IgG2a                | 1:200 | <15  | -   |
| anti-chicken IgY | -        | FITC  | Thermo         | SA1-72000              | Donkey IgG                 | 1:200 | <15  | -   |
| anti-goat IgG    | -        | AF488 | Thermo         | A-11055                | Donkey IgG                 | 1:400 | <15  | -   |
| anti-hamster IgG | -        | AF647 | Thermo         | A-21451                | Goat IgG                   | 1:400 | <15  | -   |
| anti-rabbit IgG  | -        | AF488 | Thermo         | A-11034                | Goat IgG                   | 1:400 | <15  | -   |
| anti-rabbit IgG  | -        | AF532 | Thermo         | A-11009                | Goat IgG                   | 1:400 | <15  | -   |
| anti-rabbit IgG  | -        | AF555 | Thermo         | A-21428                | Goat IgG                   | 1:400 | <15  | -   |
| anti-rabbit IgG  | -        | AF594 | Thermo         | A-11037                | Goat IgG                   | 1:400 | >120 | -   |
| anti-rabbit IgG  | -        | AF647 | Thermo         | A-21245                | Goat IgG                   | 1:400 | <15  | -   |
| anti-rabbit IgG  | -        | AF700 | Thermo         | A-21038                | Goat IgG                   | 1:400 | <15  | -   |
| anti-rabbit IgG  | -        | AF750 | Thermo         | A-21039                | Goat IgG                   | 1:400 | <15  | -   |
| anti-rabbit IgG  | -        | AF647 | Thermo         | A-31573                | Donkey IgG                 | 1:400 | <15  | -   |
| anti-rabbit IgG  | -        | AF488 | Thermo         | Z25302                 | Goat Fab <sub>2</sub>      | -     | <15  | -   |
| anti-rabbit IgG  | -        | AF532 | Thermo         | Z25303                 | Goat Fab <sub>2</sub>      | -     | <15  | -   |
| anti-rabbit IgG  | -        | AF555 | Thermo         | Z25305                 | Goat Fab <sub>2</sub>      | -     | <15  | -   |
| anti-rabbit IgG  | -        | AF594 | Thermo         | Z25307                 | Goat Fab <sub>2</sub>      | -     | >120 | -   |
| anti-rabbit IgG  | -        | AF647 | Thermo         | Z25308                 | Goat Fab <sub>2</sub>      | -     | <15  | -   |
| anti-rat IgG     | -        | AF647 | Thermo         | A-21247                | Goat IgG                   | 1:400 | <15  | -   |

374

375

376

377 **Table S2. IBEX panels for individual organs (See Figs. 3, 4A, and Movies S1-S7).**

378

379 **Spleen: 16 parameters, 3 cycles**

| Cycle | Marker               | Clone       | Conjugate | Vendor         | Catalog Number | Dilution |
|-------|----------------------|-------------|-----------|----------------|----------------|----------|
| 1     | CD8                  | 53-6.7      | BV421     | BioLegend      | 100738         | 1:200    |
|       | Autofluorescence     | -           | BV510*    | -              | -              | -        |
|       | Autofluorescence     | -           | AF488**   | -              | -              | -        |
|       | B220                 | RA3-6B2     | PE        | BD Biosciences | 553090         | 1:400    |
|       | CD4                  | GK1.5       | AF594     | BioLegend      | 100446         | 1:200    |
|       | Foxp3                | FJK-16s     | eF660     | Thermo         | 50-5773-82     | 1:50     |
|       | IgD                  | 11-26c.2a   | AF700     | BioLegend      | 405729         | 1:50     |
| 2     | F4/80                | BM8         | BV421     | BioLegend      | 123132         | 1:50     |
|       | Autofluorescence     | -           | BV510*    | -              | -              | -        |
|       | Collagen IV          | -           | None      | AbCAM          | 19808          | 1:200    |
|       | Goat anti-rabbit IgG | -           | AF488     | Thermo         | A-11034        | 1:400    |
|       | CD169                | 3D6.112     | PE        | Biolegend      | 142404         | 1:300    |
|       | CD4                  | GK1.5       | AF594     | BioLegend      | 100446         | 1:200    |
|       | CD11c                | N418        | AF647     | BioLegend      | 117312         | 1:100    |
|       | MHC-II               | M5/114.15.2 | AF700     | BioLegend      | 107622         | 1:100    |
| 3     | CD68                 | FA-11       | BV421     | BioLegend      | 137017         | 1:200    |
|       | Autofluorescence     | -           | BV510*    | -              | -              | -        |
|       | CD45                 | 30-F11      | AF488     | BioLegend      | 103122         | 1:50     |
|       | CD31                 | MEC13.3     | PE        | BD Biosciences | 553373         | 1:200    |
|       | JOJO-1               | -           | AF532     | Thermo         | J11372         | 1:20,000 |
|       | CD4                  | GK1.5       | AF594     | BioLegend      | 100446         | 1:200    |
|       | CD3                  | 17A2        | AF647     | BD Biosciences | 557869         | 1:400    |
|       | Ki-67                | B56         | AF700     | BD Biosciences | 561277         | 1:50     |

380

381 **Thymus: 26 parameters, 5 cycles**

| Cycle       | Marker               | Clone       | Conjugate | Vendor         | Catalog Number | Dilution |
|-------------|----------------------|-------------|-----------|----------------|----------------|----------|
| 1           | CD138                | 281-2       | BV421     | BD Biosciences | 562610         | 1:50     |
|             | CD11b                | 5C6         | FITC      | Bio-Rad        | MCA711F        | 1:100    |
|             | β-3 Tubulin          | AA10        | AF532     | BioLegend      | Custom         | 1:100    |
|             | B220                 | RA3-6B2     | PE        | BD Biosciences | 553090         | 1:400    |
|             | CD3                  | 17A2        | AF594     | BioLegend      | 100240         | 1:400    |
|             | CD106                | 429         | eF660     | Thermo         | 50-1061-80     | 1:50     |
|             | Collagen IV          | -           | None      | AbCAM          | 19808          | 1:200    |
|             | Goat anti-rabbit IgG | -           | AF700     | Thermo         | A-21038        | 1:400    |
| 2           | CD8                  | 53-6.7      | BV421     | BioLegend      | 100738         | 1:200    |
|             | CD25                 | PC61.5      | AF488     | Thermo         | 53-0251-82     | 1:50     |
|             | Foxp3                | FJK-16s     | AF532     | Thermo         | 58-5773-82     | 1:50     |
|             | CD4                  | RM4-5       | eF570     | Thermo         | 41-0042-82     | 1:100    |
|             | CD3                  | 17A2        | AF594     | BioLegend      | 100240         | 1:400    |
|             | DEC205               | NLDC-145    | AF647     | BioLegend      | 138204         | 1:50     |
|             | Ki-67                | B56         | AF700     | BD Biosciences | 561277         | 1:50     |
|             | CD68                 | FA-11       | BV421     | BioLegend      | 137017         | 1:200    |
| 3           | SIRPα                | P84         | AF488     | BioLegend      | 144024         | 1:50     |
|             | CD31                 | MEC13.3     | PE        | BD Biosciences | 553373         | 1:200    |
|             | CD3                  | 17A2        | AF594     | BioLegend      | 100240         | 1:400    |
|             | CD11c                | N418        | AF647     | BioLegend      | 117312         | 1:100    |
|             | MHC-II               | M5/114.15.2 | AF700     | BioLegend      | 107622         | 1:100    |
|             | CD206                | C068C2      | BV421     | BioLegend      | 141717         | 1:100    |
| 4           | αSMA                 | 1A4         | AF488     | Thermo         | 53-9760-80     | 1:500    |
|             | CD44                 | IM7         | AF532     | BioLegend      | Custom         | 1:100    |
|             | CD169                | 3D6.112     | PE        | Biolegend      | 142404         | 1:300    |
|             | CD3                  | 17A2        | AF594     | BioLegend      | 100240         | 1:400    |
|             | CD45                 | 30-F11      | AF700     | BioLegend      | 103128         | 1:50     |
|             | 5                    | JOJO-1      | -         | AF532          | Thermo         | J11372   |
| TCRγδ       |                      | GL3         | PE        | BioLegend      | 118108         | 1:100    |
| CD3         |                      | 17A2        | AF594     | BioLegend      | 100240         | 1:400    |
| Cytokeratin |                      | C-11        | AF647     | BioLegend      | 628604         | 1:200    |

382

383 **Lung: 23 parameters, 4 cycles**

| Cycle | Marker | Clone  | Conjugate | Vendor    | Catalog Number | Dilution |
|-------|--------|--------|-----------|-----------|----------------|----------|
| 1     | CD206  | C068C2 | BV421     | BioLegend | 141717         | 1:100    |
|       | CD11b  | 5C6    | FITC      | Bio-Rad   | MCA711F        | 1:100    |
|       | CD4    | RM4-5  | AF532     | Thermo    | 58-0042-80     | 1:50     |
|       | Lyve-1 | ALY7   | eF570     | Thermo    | 41-0443-82     | 1:100    |

|   |                      |             |       |                  |            |          |
|---|----------------------|-------------|-------|------------------|------------|----------|
| 2 | CD31                 | MEC13.3     | AF594 | BioLegend        | 102520     | 1:100    |
|   | CD11c                | N418        | AF647 | BioLegend        | 117312     | 1:100    |
|   | SiglecF              | 1RNM44N     | AF700 | Thermo           | 56-1702-80 | 1:50     |
|   | CD68                 | FA-11       | BV421 | BioLegend        | 137017     | 1:200    |
|   | Ly-6G                | 1A8         | AF488 | BioLegend        | 127626     | 1:50     |
|   | $\beta$ -3 Tubulin   | AA10        | AF532 | BioLegend        | Custom     | 1:100    |
|   | B220                 | RA3-6B2     | PE    | BD Biosciences   | 553090     | 1:400    |
|   | CD31                 | MEC13.3     | AF594 | BioLegend        | 102520     | 1:100    |
|   | EpCAM                | G8.8        | AF647 | BioLegend        | 118212     | 1:200    |
|   | MHC-II               | M5/114.15.2 | AF700 | BioLegend        | 107622     | 1:100    |
| 3 | CD138                | 281-2       | BV421 | BD Biosciences   | 562610     | 1:50     |
|   | KLRG1                | 2F1         | AF488 | BD Biosciences   | 561619     | 1:50     |
|   | IgA                  | -           | AF555 | Southern Biotech | 1040-32    | 1:500    |
|   | CD31                 | MEC13.3     | AF594 | BioLegend        | 102520     | 1:100    |
|   | CD44                 | IM7         | AF647 | BioLegend        | 103018     | 1:100    |
|   | Collagen IV          | -           | None  | AbCAM            | 19808      | 1:200    |
|   | Goat anti-rabbit IgG | -           | AF700 | Thermo           | A-21038    | 1:400    |
| 4 | $\alpha$ SMA         | 1A4         | AF488 | Thermo           | 53-9760-80 | 1:500    |
|   | JOJO-1               | -           | AF532 | Thermo           | J11372     | 1:20,000 |
|   | CD169                | 3D6.112     | PE    | BioLegend        | 142404     | 1:300    |
|   | CD31                 | MEC13.3     | AF594 | BioLegend        | 102520     | 1:100    |
|   | CD8                  | 53-6.7      | AF647 | BioLegend        | 100724     | 1:200    |
|   | CD45                 | 30-F11      | AF700 | BioLegend        | 103128     | 1:50     |

384

385 **Small Intestine: 20 parameters, 3 cycles**

| Cycle | Marker               | Clone       | Conjugate | Vendor           | Catalog Number | Dilution |
|-------|----------------------|-------------|-----------|------------------|----------------|----------|
| 1     | CD8                  | 53-6.7      | BV421     | BioLegend        | 100738         | 1:200    |
|       | CD35                 | 8C12        | BV510     | BD Biosciences   | 740132         | 1:600    |
|       | CD4                  | RM4-5       | AF532     | Thermo           | 58-0042-80     | 1:50     |
|       | Foxp3                | FJK-16s     | eF570     | Thermo           | 41-5773-82     | 1:50     |
|       | EpCAM                | G8.8        | AF594     | BioLegend        | 118222         | 1:400    |
|       | CD3                  | 17A2        | AF647     | BD Biosciences   | 557869         | 1:400    |
|       | IgD                  | 11-26c.2a   | AF700     | BioLegend        | 405729         | 1:50     |
| 2     | CD117                | 2B8         | BV421     | BioLegend        | 105827         | 1:50     |
|       | B220                 | RA3-6B2     | BV510     | BioLegend        | 103248         | 1:300    |
|       | KLRG1                | 2F1         | AF488     | BD Biosciences   | 561619         | 1:50     |
|       | DCAMKL1              | -           | None      | AbCAM            | Ab37994        | 1:50     |
|       | Goat anti-rabbit IgG | -           | AF532     | Thermo           | A-11009        | 1:400    |
|       | IgA                  | -           | AF555     | Southern Biotech | 1040-32        | 1:500    |
|       | EpCAM                | G8.8        | AF594     | BioLegend        | 118222         | 1:400    |
|       | CD31                 | MEC13.3     | AF647     | BioLegend        | 102516         | 1:100    |
| 3     | Ki-67                | B56         | AF700     | BD Biosciences   | 561277         | 1:50     |
|       | CD45                 | 30-F11      | BV421     | BioLegend        | 103134         | 1:100    |
|       | CD11b                | 5C6         | FITC      | Bio-Rad          | MCA711F        | 1:100    |
|       | JOJO-1               | -           | AF532     | Thermo           | J11372         | 1:20,000 |
|       | Lyve-1               | ALY7        | eF570     | Thermo           | 41-0443-82     | 1:100    |
|       | EpCAM                | G8.8        | AF594     | BioLegend        | 118222         | 1:400    |
|       | CD11c                | N418        | AF647     | BioLegend        | 117312         | 1:100    |
|       | MHC-II               | M5/114.15.2 | AF700     | BioLegend        | 107622         | 1:100    |

386

387 **Liver: 18 parameters, 4 cycles**

| Cycle         | Marker                                | Clone   | Conjugate  | Vendor    | Catalog Number | Dilution |
|---------------|---------------------------------------|---------|------------|-----------|----------------|----------|
| 1             | CD4                                   | GK1.5   | BV421      | BioLegend | 100443         | 1:200    |
|               | Autofluorescence                      | -       | BV510*     | -         | -              | -        |
|               | Autofluorescence                      | -       | AF488**    | -         | -              | -        |
|               | LysM-tdTomato*                        | -       | 565-595 nm | -         | -              | -        |
|               | Laminin 1 + 2                         | -       | None       | AbCAM     | Ab7463         | 1:100    |
|               | Goat anti-rabbit IgG                  | -       | AF594      | Thermo    | A-11037        | 1:400    |
|               | E-cadherin                            | DECMA-1 | AF647      | BioLegend | 147308         | 1:100    |
| 2             | CD8                                   | 53-6.7  | BV421      | BioLegend | 100738         | 1:200    |
|               | Autofluorescence                      | -       | BV510*     | -         | -              | -        |
|               | Autofluorescence                      | -       | AF488**    | -         | -              | -        |
|               | Desmin                                | -       | None       | AbCAM     | Ab15200        | 1:200    |
|               | Goat anti-rabbit IgG Fab <sub>2</sub> | -       | AF532      | Thermo    | Z25303         | -        |
|               | Laminin 1 + 2                         | -       | None       | AbCAM     | Ab7463         | 1:100    |
|               | Goat anti-rabbit IgG                  | -       | AF594      | Thermo    | A-11037        | 1:400    |
|               | CXCR6                                 | 221002  | AF647      | Novus     | FAB2145R       | 1:50     |
| 3             | CD44                                  | IM7     | AF700      | BioLegend | 103026         | 1:50     |
|               | NK1.1                                 | PK136   | BV421      | BioLegend | 108731         | 1:50     |
|               | Autofluorescence                      | -       | BV510*     | -         | -              | -        |
|               | Autofluorescence                      | -       | AF488**    | -         | -              | -        |
|               | CD3                                   | 17A2    | AF532      | Thermo    | 58-0032-80     | 1:50     |
| Laminin 1 + 2 | -                                     | None    | AbCAM      | Ab7463    | 1:100          |          |



|        |                                       |         |           |                |         |       |
|--------|---------------------------------------|---------|-----------|----------------|---------|-------|
|        | Goat anti-rabbit IgG                  | -       | AF594     | Thermo         | A-11037 | 1:400 |
|        | B220                                  | RA3-6B2 | AF647     | BioLegend      | 103226  | 1:400 |
|        | CD45                                  | 30-F11  | AF700     | BioLegend      | 103128  | 1:50  |
| 4      | Tim-4                                 | 21H12   | BV421     | BD Biosciences | 742773  | 1:100 |
|        | Autofluorescence                      | -       | BV510*    | -              | -       | -     |
|        | CD11b                                 | M1/70   | AF488     | BioLegend      | 101217  | 1:100 |
|        | Glutamine Synthetase                  | -       | None      | AbCAM          | Ab49873 | 1:200 |
|        | Goat anti-rabbit IgG Fab <sub>2</sub> | -       | AF532     | Thermo         | Z25303  | -     |
|        | CD1d                                  | 1B1     | PE        | BD Biosciences | 553846  | 1:100 |
|        | Laminin 1 + 2                         | -       | None      | AbCAM          | Ab7463  | 1:100 |
|        | Goat anti-rabbit IgG                  | -       | AF594     | Thermo         | A-11037 | 1:400 |
|        | CD11c                                 | N418    | AF647     | BioLegend      | 117312  | 1:100 |
| MHC-II | M5/114.15.2                           | AF700   | BioLegend | 107622         | 1:100   |       |

\*LsyM-tdTomato reporter animal

388

389

### Naïve and immunized LNs: 41 parameters, 10 cycles

| Cycle                | Marker                | Clone       | Conjugate    | Vendor         | Catalog Number | Dilution |
|----------------------|-----------------------|-------------|--------------|----------------|----------------|----------|
| 1                    | PD-1                  | 29F.1.A12   | BV421        | BioLegend      | 135218         | 1:100    |
|                      | CD35                  | 8C12        | BV510        | BD Biosciences | 740132         | 1:500    |
|                      | B220                  | RA3-6B2     | AF488        | BD Biosciences | 557669         | 1:400    |
|                      | JOJO-1                | -           | -            | Thermo         | J11372         | 1:20,000 |
|                      | CD3                   | 17A2        | AF594        | BioLegend      | 100240         | 1:100    |
|                      | Bcl6                  | K112-91     | AF647        | BD Biosciences | 561525         | 1:50     |
|                      | Ki-67                 | B56         | AF700        | BD Biosciences | 561277         | 1:50     |
| 2                    | CD200                 | OX-90       | BV421        | BD Biosciences | 565547         | 1:50     |
|                      | αSMA                  | 1A4         | AF488        | Thermo         | 53-9760-80     | 1:200    |
|                      | JOJO-1                | -           | -            | Thermo         | J11372         | 1:20,000 |
|                      | Lyve-1                | ALY7        | eF570        | Thermo         | 41-0443-82     | 1:100    |
|                      | CD3                   | 17A2        | AF594        | BioLegend      | 100240         | 1:100    |
|                      | gp38                  | 8.1.1       | -            | BioLegend      | 127401         | 1:50     |
|                      | Goat anti-hamster IgG | -           | AF647        | Thermo         | A-21451        | 1:400    |
|                      | Collagen IV           | -           | -            | AbCAM          | 19808          | 1:200    |
| Goat anti-rabbit IgG | -                     | AF700       | Thermo       | A-21038        | 1:400          |          |
| 3                    | F4/80                 | BM8         | BV421        | BioLegend      | 123132         | 1:50     |
|                      | CD11b                 | 5C6         | FITC         | Thermo         | MA5-16529      | 1:100    |
|                      | JOJO-1                | -           | -            | Thermo         | J11372         | 1:20,000 |
|                      | CD207                 | eBioL31     | PE           | Thermo         | 12-2075-80     | 1:50     |
|                      | CD3                   | 17A2        | AF594        | BioLegend      | 100240         | 1:100    |
|                      | CD11c                 | N418        | AF647        | BioLegend      | 117312         | 1:100    |
|                      | CD8                   | 53-6.7      | BV421        | BioLegend      | 100738         | 1:200    |
| 4                    | JOJO-1                | -           | -            | Thermo         | J11372         | 1:20,000 |
|                      | CD4                   | GK1.5       | PE           | BD Biosciences | 553730         | 1:200    |
|                      | CD3                   | 17A2        | AF594        | BioLegend      | 100240         | 1:100    |
|                      | Foxp3                 | FJK-16s     | eF660        | Thermo         | 50-5773-82     | 1:50     |
|                      | CD206                 | C068C2      | BV421        | BioLegend      | 141717         | 1:100    |
|                      | SIRPα                 | P84         | AF488        | BioLegend      | 144024         | 1:50     |
|                      | JOJO-1                | -           | -            | Thermo         | J11372         | 1:20,000 |
| 5                    | TCRγδ                 | GL3         | PE           | BioLegend      | 118108         | 1:100    |
|                      | CD3                   | 17A2        | AF594        | BioLegend      | 100240         | 1:100    |
|                      | DEC205                | NLDC-145    | AF647        | BioLegend      | 138204         | 1:50     |
|                      | CD68                  | FA-11       | BV421        | BioLegend      | 137017         | 1:200    |
|                      | JOJO-1                | -           | -            | Thermo         | J11372         | 1:20,000 |
|                      | CD169                 | 3D6.112     | PE           | BioLegend      | 142404         | 1:300    |
|                      | CD3                   | 17A2        | AF594        | BioLegend      | 100240         | 1:100    |
| 6                    | CD64                  | X54-5/7.1   | AF647        | BioLegend      | 139322         | 1:50     |
|                      | CD21                  | 7E9         | Pacific Blue | BioLegend      | 123413         | 1:200    |
|                      | CD106                 | 429         | AF488        | BioLegend      | 105710         | 1:50     |
|                      | JOJO-1                | -           | -            | Thermo         | J11372         | 1:20,000 |
|                      | CD31                  | MEC13.3     | PE           | BD Biosciences | 553373         | 1:200    |
|                      | CD3                   | 17A2        | AF594        | BioLegend      | 100240         | 1:100    |
|                      | CD23                  | B3B4        | AF647        | BioLegend      | 101611         | 1:50     |
| 7                    | CD138                 | 281-2       | BV421        | BD Biosciences | 562610         | 1:50     |
|                      | IRF4                  | 3E4         | FITC         | Thermo         | 11-9858-82     | 1:50     |
|                      | JOJO-1                | -           | -            | Thermo         | J11372         | 1:20,000 |
|                      | SiglecF               | E50-2440    | PE           | BD Biosciences | 552126         | 1:100    |
|                      | CD3                   | 17A2        | AF594        | BioLegend      | 100240         | 1:100    |
|                      | Pax5                  | 1H9         | AF647        | BioLegend      | 649704         | 1:100    |
| 8                    | NK1.1                 | PK136       | BV421        | BioLegend      | 108731         | 1:50     |
|                      | KLRG1                 | 2F1         | AF488        | BD Biosciences | 561619         | 1:56     |
|                      | JOJO-1                | -           | -            | Thermo         | J11372         | 1:20,000 |
|                      | GL-7                  | GL7         | PE           | BD Biosciences | 561530         | 1:100    |
|                      | CD3                   | 17A2        | AF594        | BioLegend      | 100240         | 1:100    |
|                      | CD44                  | IM7         | AF647        | BioLegend      | 103018         | 1:100    |
| 9                    | MHC-II                | M5/114.15.2 | BV421        | BioLegend      | 107631         | 1:400    |
|                      | IgD                   | 11-26c.2a   | AF488        | BioLegend      | 405718         | 1:400    |
|                      | JOJO-1                | -           | -            | Thermo         | J11372         | 1:20,000 |
|                      | CD3                   | 17A2        | AF594        | BioLegend      | 100240         | 1:100    |
|                      | CD45                  | 30-F11      | AF647        | BioLegend      | 103124         | 1:400    |

390 **Table S3. IBEX panels for human LNs (See Fig. 5, Movie S8).**

391 **Metastatic pancreatic LN: 17 parameters, 4 cycles**

| Cycle | Marker                              | Clone    | Conjugate     | Vendor          | Catalog Number          | Dilution       |
|-------|-------------------------------------|----------|---------------|-----------------|-------------------------|----------------|
| 1     | Hoechst                             | -        | -             | Biotium         | 40046                   | 1:5000         |
|       | CD8                                 | SK1      | AF488         | BioLegend       | 344716                  | 1:50           |
|       | CD3                                 | UCHT1    | AF532         | Thermo          | 58-0038-42              | 1:50           |
|       | FOXP3                               | 236A/E7  | eF570         | Thermo          | 41-4777-82              | 1:50           |
|       | EpCAM                               | 9C4      | AF594         | BioLegend       | 324228                  | 1:500          |
|       | CD25                                | M-A251   | AF647         | BioLegend       | 356127                  | 1:50           |
|       | CD4                                 | RPA-T4   | AF700         | BioLegend       | 300526                  | 1:25           |
| 2     | Hoechst                             | -        | -             | Biotium         | 40046                   | 1:5000         |
|       | CD45                                | HI30     | AF532         | Thermo          | 58-0459-41              | 1:50           |
|       | PD-1                                | EH12.2H7 | PE            | BioLegend       | 329906                  | 1:200          |
|       | EpCAM                               | 9C4      | AF594         | BioLegend       | 324228                  | 1:500          |
|       | CD69                                | FN50     | AF647         | BioLegend       | 310918                  | 1:100          |
|       | Hoechst                             | -        | -             | Biotium         | 40046                   | 1:5000         |
| 3     | HLA-DR                              | L243     | AF488         | BioLegend       | 307619                  | 1:200          |
|       | SPARC                               | Goat IgG | AF532         | R&D             | AF941<br>(Unconjugated) | 1:50           |
|       | EpCAM                               | 9C4      | AF594         | BioLegend       | 324228                  | 1:500          |
|       | CD68                                | KP1      | AF647         | Santa Cruz      | Sc-200060               | 1:100          |
|       | Collagen IV<br>Goat anti-rabbit IgG | -        | None<br>AF700 | AbCAM<br>Thermo | Ab6586<br>A-21038       | 1:200<br>1:400 |
|       | Hoechst                             | -        | -             | Biotium         | 40046                   | 1:5000         |
| 4     | CD21                                | Bu32     | AF532         | BioLegend       | Custom                  | 1:400          |
|       | EpCAM                               | 9C4      | AF594         | BioLegend       | 324228                  | 1:500          |
|       | CD138                               | MI15     | AF647         | BioLegend       | 356523                  | 1:200          |
|       | Ki-67                               | B56      | AF700         | BD Biosciences  | 561277                  | 1:50           |
|       | Hoechst                             | -        | -             | Biotium         | 40046                   | 1:5000         |

392

393 **Mesenteric LN: 66 parameters, 20 cycles**

| Cycle | Marker                              | Clone    | Conjugate     | Vendor                     | Catalog Number           | Dilution       |
|-------|-------------------------------------|----------|---------------|----------------------------|--------------------------|----------------|
| 1     | Hoechst                             | -        | -             | Biotium                    | 40046                    | 1:5000         |
|       | CD20                                | L26      | AF488         | Thermo                     | 53-0202-82               | 1:200          |
|       | SPARC                               | Goat IgG | AF532         | R&D                        | AF941<br>(Unconjugated)  | 1:50           |
|       | CD10                                | FR4D11   | PE            | Caprico<br>Biotechnologies | 103926                   | 1:50           |
|       | CD3                                 | UCHT1    | AF594         | BioLegend                  | 300446                   | 1:100          |
|       | BCL2                                | 100      | AF647         | BioLegend                  | 658705                   | 1:25           |
|       | Collagen IV<br>Goat anti-rabbit IgG | -        | None<br>AF700 | AbCAM<br>Thermo            | Ab6586<br>A-21038        | 1:200<br>1:400 |
|       | Hoechst                             | -        | -             | Biotium                    | 40046                    | 1:5000         |
| 2     | IgD                                 | IA6-2    | AF488         | BioLegend                  | 348216                   | 1:25           |
|       | CD21                                | Bu32     | AF532         | BioLegend                  | NA_Custom                | 1:600          |
|       | CD138                               | MI15     | PE            | BioLegend                  | 356504                   | 1:200          |
|       | CD3                                 | UCHT1    | AF594         | BioLegend                  | 300446                   | 1:100          |
|       | BCL6                                | K112-91  | AF647         | BD Biosciences             | 561525                   | 1:25           |
|       | CD31                                | WM59     | AF700         | BioLegend                  | 303133                   | 1:25           |
|       | Hoechst                             | -        | -             | Biotium                    | 40046                    | 1:5000         |
|       | HLA-DR                              | L243     | AF488         | BioLegend                  | 307620                   | 1:100          |
| 3     | CD23                                | EBVCS-5  | AF532         | BioLegend                  | NA_Custom                | 1:25           |
|       | CD1c                                | L161     | PE            | BioLegend                  | 331506                   | 1:50           |
|       | CD3                                 | UCHT1    | AF594         | BioLegend                  | 300446                   | 1:100          |
|       | CD163                               | GH1/61   | AF647         | BioLegend                  | 333620                   | 1:100          |
|       | CD11c                               | B-Ly6    | AF700         | BD Biosciences             | 561352                   | 1:25           |
|       | Hoechst                             | -        | -             | Biotium                    | 40046                    | 1:5000         |
|       | CD8                                 | SK1      | AF488         | BioLegend                  | 344716                   | 1:25           |
|       | CD4                                 | RPA-T4   | AF532         | Thermo                     | 58-0049-42               | 1:25           |
| 4     | FOXP3                               | 236A/E7  | eF570         | Thermo                     | 41-4777-82               | 1:25           |
|       | CD3                                 | UCHT1    | AF594         | BioLegend                  | 300446                   | 1:100          |
|       | CD25                                | M-A251   | AF647         | BioLegend                  | 356128                   | 1:50           |
|       | Ki-67                               | B56      | AF700         | BD Biosciences             | 561277                   | 1:50           |
|       | Hoechst                             | -        | -             | Biotium                    | 40046                    | 1:5000         |
|       | ICOS                                | CS98.4A  | AF488         | BioLegend                  | 313514                   | 1:25           |
|       | CXCL13                              | Goat IgG | AF532         | R&D                        | AF801<br>(Unconjugated)  | 1:25           |
|       | PD-1                                | EH12.2H7 | PE            | BioLegend                  | 329906                   | 1:100          |
| 5     | CD3                                 | UCHT1    | AF594         | BioLegend                  | 300446                   | 1:100          |
|       | CD69                                | FN50     | AF647         | BioLegend                  | 310918                   | 1:25           |
|       | Hoechst                             | -        | -             | Biotium                    | 40046                    | 1:5000         |
|       | CD117                               | 104D2    | AF488         | BioLegend                  | 313234                   | 1:50           |
|       | Lyve-1                              | Goat IgG | AF532         | R&D                        | AF2089<br>(Unconjugated) | 1:100          |
|       | Hoechst                             | -        | -             | Biotium                    | 40046                    | 1:5000         |
|       | CD117                               | 104D2    | AF488         | BioLegend                  | 313234                   | 1:50           |
|       | Lyve-1                              | Goat IgG | AF532         | R&D                        | AF2089<br>(Unconjugated) | 1:100          |

|    |                         |              |              |                            |                              |        |
|----|-------------------------|--------------|--------------|----------------------------|------------------------------|--------|
|    | CD35                    | E11          | PE           | BioLegend                  | 333406                       | 1:800  |
|    | CD3                     | UCHT1        | AF594        | BioLegend                  | 300446                       | 1:100  |
|    | CD68                    | KP1          | AF647        | Santa Cruz                 | sc-20060                     | 1:100  |
|    | CD38                    | HIT2         | AF700        | BioLegend                  | 303524                       | 1:25   |
| 7  | Hoechst                 | -            | -            | Biotium                    | 40046                        | 1:5000 |
|    | Clec9a                  | 8F9          | AF488        | BioLegend                  | Custom                       | 1:25   |
|    | Tim-3                   | 344823       | AF532        | R&D                        | MAB2365<br>(Unconjugated)    | 1:25   |
|    | IRF4                    | IRF4.3E4     | PE           | BioLegend                  | 646404                       | 1:25   |
|    | CD3                     | UCHT1        | AF594        | BioLegend                  | 300446                       | 1:100  |
|    | DC-SIGN                 | 9E9A8        | AF647        | BioLegend                  | 330112                       | 1:50   |
| 8  | Hoechst                 | -            | -            | Biotium                    | 40046                        | 1:5000 |
|    | CXCL12                  | 79018        | AF532        | R&D                        | MAB350-500<br>(Unconjugated) | 1:25   |
|    | TCR $\gamma\delta$      | B1           | PE           | BioLegend                  | 331210                       | 1:100  |
|    | CD3                     | UCHT1        | AF594        | BioLegend                  | 300446                       | 1:100  |
|    | V $\alpha$ 7.2          | 3C10         | AF647        | BioLegend                  | 351726                       | 1:50   |
| 9  | Hoechst                 | -            | -            | Biotium                    | 40046                        | 1:5000 |
|    | $\alpha$ -SMA           | 1A4          | AF488        | Thermo                     | 53-9760-82                   | 1:100  |
|    | CD45                    | HI30         | AF532        | Thermo                     | 58-0459-42                   | 1:25   |
|    | CD106                   | STA          | PE           | BioLegend                  | 305806                       | 1:50   |
|    | CD3                     | UCHT1        | AF594        | BioLegend                  | 300446                       | 1:100  |
|    | CD44                    | IM7          | AF647        | BioLegend                  | 103018                       | 1:50   |
| 10 | Hoechst                 | -            | -            | Biotium                    | 40046                        | 1:5000 |
|    | Lumican                 | Goat IgG     | AF532        | R&D                        | AF2745<br>(Unconjugated)     | 1:50   |
|    | CD34                    | QBEND/10     | PE           | Thermo                     | MA1-10205                    | 1:50   |
|    | CD3                     | UCHT1        | AF594        | BioLegend                  | 300446                       | 1:100  |
|    | CD54                    | HA58         | AF647        | BioLegend                  | 353114                       | 1:50   |
| 11 | Hoechst                 | -            | -            | Biotium                    | 40046                        | 1:5000 |
|    | NF-H/NF-M               | SM1-35       | AF488        | BioLegend                  | 835614                       | 1:50   |
|    | CD3                     | UCHT1        | AF594        | BioLegend                  | 300446                       | 1:100  |
|    | CD66b                   | G10F5        | AF647        | BioLegend                  | 305110                       | 1:25   |
| 12 | Hoechst                 | -            | -            | Biotium                    | 40046                        | 1:5000 |
|    | CD166                   | EPR2759      | AF488        | AbCAM                      | Ab197543                     | 1:125  |
|    | Fibronectin             | 2F4          | AF532        | Novus                      | NBP2-22113AF532              | 1:25   |
|    | CD39                    | A1           | PE           | BioLegend                  | 328208                       | 1:50   |
|    | CD3                     | UCHT1        | AF594        | BioLegend                  | 300446                       | 1:100  |
|    | Cytokeratin             | AE1/AE3      | eF660        | Thermo                     | 50-9003-82                   | 1:100  |
| 13 | Hoechst                 | -            | -            | Biotium                    | 40046                        | 1:5000 |
|    | MARCO                   | Rabbit IgG   | -            | Thermo                     | PA5-64134                    | 1:25   |
|    | Zenon Fab               | -            | AF532        | Thermo                     | Z25303                       | NA     |
|    | CD94                    | DX22         | PE           | BioLegend                  | 305506                       | 1:50   |
|    | CD3                     | UCHT1        | AF594        | BioLegend                  | 300446                       | 1:100  |
|    | EpCAM                   | 9C4          | AF647        | BioLegend                  | 324212                       | 1:100  |
| 14 | Hoechst                 | -            | -            | Biotium                    | 40046                        | 1:5000 |
|    | $\beta$ -Tubulin 3      | TUJ1         | AF532        | BioLegend                  | Custom                       | 1:50   |
|    | CD49a                   | TS2/7        | PE           | BioLegend                  | 328304                       | 1:50   |
|    | CD3                     | UCHT1        | AF594        | BioLegend                  | 300446                       | 1:100  |
|    | IgM                     | EPR5539-65-4 | AF647        | AbCAM                      | Ab200629                     | 1:100  |
| 15 | Hoechst                 | -            | -            | Biotium                    | 40046                        | 1:5000 |
|    | IgA2                    | A9604D2      | AF488        | SouthernBiotech            | 9140-30                      | 1:500  |
|    | p53                     | PAb 240      | PE           | Novus                      | NB200-103PE                  | 1:50   |
|    | CD3                     | UCHT1        | AF594        | BioLegend                  | 300446                       | 1:100  |
|    | IgA1                    | B3506B4      | AF647        | SouthernBiotech            | 9130-31                      | 1:500  |
| 16 | Hoechst                 | -            | -            | Biotium                    | 40046                        | 1:5000 |
|    | Laminin 1+2             | Rabbit IgG   | -            | AbCAM                      | Ab7463                       | 1:100  |
|    | Zenon Fab               | -            | AF488        | Thermo                     | Z25302                       | NA     |
|    | Lysozyme                | Rabbit IgG   | -            | AbCAM                      | Ab2408                       | 1:50   |
|    | Zenon Fab               | -            | AF532        | Thermo                     | Z25303                       | NA     |
|    | CD3                     | UCHT1        | AF594        | BioLegend                  | 300446                       | 1:100  |
| 17 | Hoechst                 | -            | -            | Biotium                    | 40046                        | 1:5000 |
|    | Keratin 18              | 1G11C4       | CoraLite488  | ProteinTech                | CL488-66187                  | 1:50   |
|    | Vimentin                | O91D3        | AF532        | BioLegend                  | Custom                       | 1:200  |
|    | CD3                     | UCHT1        | AF594        | BioLegend                  | 300446                       | 1:100  |
| 18 | Hoechst                 | -            | -            | Biotium                    | 40046                        | 1:5000 |
|    | Desmin                  | Y66          | AF488        | AbCAM                      | Ab185033                     | 1:200  |
|    | CD3                     | UCHT1        | AF594        | BioLegend                  | 300446                       | 1:100  |
|    | Tryptase                | AA1          | -            | AbCAM                      | Ab2378                       | 1:50   |
|    | Zenon Fab               | -            | AF700        | Thermo                     | Z25011                       | NA     |
| 19 | Hoechst                 | -            | -            | Biotium                    | 40046                        | 1:5000 |
|    | Donkey anti-goat IgG    | -            | AF488        | Thermo                     | A11055                       | 1:1000 |
|    | CD45                    | F10-89-4     | PE/iFluor594 | Caprico<br>Biotechnologies | 1016185                      | 1:50   |
|    | CD3                     | UCHT1        | AF594        | BioLegend                  | 300446                       | 1:100  |
|    | Donkey anti-rabbit IgG  | -            | AF647        | Thermo                     | A31573                       | 1:1000 |
| 20 | Hoechst                 | -            | -            | Biotium                    | 40046                        | 1:5000 |
|    | Keratin 14              | Poly9060     | -            | BioLegend                  | 906004                       | 1:50   |
|    | Donkey anti-chicken IgY | -            | FITC         | Thermo                     | SA1-72000                    | 1:200  |
|    | CD3                     | UCHT1        | AF594        | BioLegend                  | 300446                       | 1:100  |

|  |                   |   |       |        |        |        |
|--|-------------------|---|-------|--------|--------|--------|
|  | Goat anti-rat IgG | - | AF647 | Thermo | A21247 | 1:1000 |
|--|-------------------|---|-------|--------|--------|--------|

394

395

396 **Table S4. Reagents used for multi-plex Opal IHC experiments (See Figs. 6B, S7A, and Movie**  
 397 **S9).**

398

| Marker          | Clone   | Conjugate | Vendor            | Cat No.     | Isotype      | Dilution | Time to bleach with LIBH <sub>4</sub> |
|-----------------|---------|-----------|-------------------|-------------|--------------|----------|---------------------------------------|
| CD3e            | D4V8L   | None      | CST               | 99940       | Rabbit IgG   | 1:100    | -                                     |
| CD4             | D7D2Z   | None      | CST               | 25229       | Rabbit IgG   | 1:100    | -                                     |
| CD8             | D4W2Z   | None      | CST               | 98941       | Rabbit IgG   | 1:200    | -                                     |
| CD11c           | D1V9Y   | None      | CST               | 97585       | Rabbit IgG   | 1:100    | -                                     |
| CD19            | D4V4B   | None      | CST               | 90176       | Rabbit IgG   | 1:300    | -                                     |
| CD138           | 281-2   | PE        | BioLegend         | 142504      | Rat IgG2a, κ | 1:100    | -                                     |
| Collagen IV     | -       | None      | AbCam             | 19808       | Rabbit IgG   | 1:50     | -                                     |
| CXCL9           | -       | None      | R&D               | AF-492-NA   | Goat IgG     | 1:50     | -                                     |
| E-cadherin      | DECMA-1 | AF488     | Thermo            | 53-3249-82  | Rat IgG1, κ  | 1:100    | -                                     |
| F4/80           | D2S9R   | None      | CST               | 70076       | Rabbit IgG   | 1:100    | -                                     |
| F4/80           | BM8     | BV421     | BioLegend         | 123132      | Rat IgG2a, κ | 1:50     | -                                     |
| Foxp3           | D6O8R   | None      | CST               | 12653       | Rabbit IgG   | 1:200    | -                                     |
| Laminin         | -       | None      | AbCam             | Ab7463      | Rabbit IgG   | 1:100    | -                                     |
| MHCII           | -       | None      | AbCam             | Ab180779    | Rabbit IgG   | 1:100    | -                                     |
| Anti-rabbit IgG | -       | HRP       | -                 | -           | Goat IgG     | 1:5      | -                                     |
| -               | -       | Opal 520  | Akoya Biosciences | FP1487001KT | -            | -        | >30 minutes                           |
| -               | -       | Opal 540  | Akoya Biosciences | FP1494001KT | -            | -        | >30 minutes                           |
| -               | -       | Opal 570  | Akoya Biosciences | FP1488001KT | -            | -        | 30 minutes                            |
| -               | -       | Opal 620  | Akoya Biosciences | FP1495001KT | -            | -        | >30 minutes                           |
| -               | -       | Opal 650  | Akoya Biosciences | FP1496001KT | -            | -        | 30 minutes                            |
| -               | -       | Opal 690  | Akoya Biosciences | FP1497001KT | -            | -        | 30 minutes                            |

399

400 **Table S5. Reagents used in combined IBEX oligonucleotide-based staining panel. (See Figs.**  
 401 **6D, S7C-D, and Movie S9).**

| Cycle      | Antibody/Dye        | Clone       | Vendor         | Cat No.    | Imaging oligo sequence |
|------------|---------------------|-------------|----------------|------------|------------------------|
| 1          | Hoechst             | -           | Biotium        | 40046      | -                      |
|            | SIRP $\alpha$ AF488 | P84         | BioLegend      | 144024     | -                      |
|            | Foxp3 AF532         | FJK-16s     | Thermo         | 58-5773-82 | -                      |
|            | CD31 PE             | MEC13.3     | BD Biosciences | 553373     | -                      |
|            | CD11c AF647         | N418        | BioLegend      | 117312     | -                      |
|            | Ki-67 AF700         | B56         | BD Biosciences | 561277     | -                      |
| 2          | Hoechst             | -           | Biotium        | 40046      | -                      |
|            | CD169 AF532*        | 3D6.112     | BioLegend      | 142425     | ATGACTGTGTCGAATTG      |
|            | IgD Atto 550*       | 11.26c.2a   | BioLegend      | 405745     | GGACAACGGATATGATG      |
|            | CD11b AF647*        | M1/70       | BioLegend      | 101265     | ACAAATGAGCCTTCATG      |
|            | MHCII IR700*        | M5/114.15.2 | BioLegend      | 107653     | ATCATACTGGTGACCTG      |
| 3          | Hoechst             | -           | Biotium        | 40046      | -                      |
|            | CD45 AF532*         | 30-F11      | BioLegend      | 103159     | TCTGCTCCATAGCCATG      |
|            | CD68 Atto 550*      | FA-11       | BioLegend      | 137031     | TCCCGTGAAGAAAGTG       |
|            | CD3 AF647*          | 17A2        | BioLegend      | 100251     | ATCGAGCGGACATACTG      |
| Non-IBEX** | B220 AF488*         | RA3-6B2     | BioLegend      | 103263     | ATTATGAGGTGTAGGTG      |
|            | CD11c AF594*        | N418        | BioLegend      | 117355     | GCAAGCGTCCATAACTG      |

402

403 \*Denotes fluorescent label provided by complementary fluorescent oligonucleotides.

404 \*\*Additional reagents tested (Figure S7C).

405

406

407 **Movies S1-S9 Legends**

408 **Movie S1. High dimensional imaging of the spleen using IBEX.** Confocal images of mouse  
409 spleen tissue from a 3 cycle 16 parameter IBEX experiment with CD4 serving as a fiducial. See  
410 Fig. 3. Data are representative of 2 similar experiments.

411 **Movie S2. High dimensional imaging of the thymus using IBEX.** Confocal images of mouse  
412 thymus tissue from a 5 cycle 26 parameter IBEX experiment with CD3 serving as a fiducial. See  
413 Fig. 3. Data are representative of 2 similar experiments.

414 **Movie S3. High dimensional imaging of the lung using IBEX.** Confocal images of mouse lung  
415 tissue from a 4 cycle 23 parameter IBEX experiment with CD31 serving as a fiducial. See Fig. 3.  
416 Data are representative of 2 similar experiments.

417 **Movie S4. High dimensional imaging of the small intestine using IBEX.** Confocal images of  
418 mouse small intestine tissue from a 3 cycle 20 parameter IBEX experiment with EpCAM serving as  
419 a fiducial. See Fig. 3. Data are representative of 2 similar experiments.

420 **Movie S5. High dimensional imaging of the liver using IBEX.** Confocal images of liver tissue  
421 from a LysM-tdTomato mouse. A 4 cycle 18 parameter IBEX experiment was performed with  
422 Laminin serving as a fiducial. See Fig. 3. Data are representative of 2 similar experiments.

423 **Movie S6. High dimensional imaging of naïve and immunized LNs using IBEX.** Confocal  
424 images of pLNs from naïve and SRBC-immunized mice from 10 cycle 41 parameter IBEX  
425 experiments. See Fig. 4A. Data are representative of 2 similar experiments.

426 **Movie S7. Comparable staining observed by serial and iterative immunofluorescence**  
427 **methods.** Confocal images of inguinal LN (iLN) or pLNs from SRBC-immunized mice  
428 demonstrating qualitatively similar staining patterns when antibody panels were applied on  
429 individual sections alone (serial) versus on the same section iteratively (IBEX). See Figs. 4 and S5.  
430 Data are representative of 2 similar experiments.

431 **Movie S8. IBEX scales to capture ultra-high content imaging in large human tissues.**  
432 Confocal images of human LN tissue section with metastatic lesions from a 4 cycle 17 parameter  
433 IBEX experiment or human mesenteric LN from a 20 cycle 66 parameter IBEX experiment. See  
434 Fig. 5. Data are representative of similar experiments in normal and diseased human LNs.

435 **Movie S9. Extensions of IBEX workflow to include Opal fluorophores and oligo-conjugated**  
436 **antibodies.** Representative confocal images from a 10 parameter 4 cycle IBEX experiment  
437 incorporating Opal fluorophores performed on heavily fixed mouse pLN tissue sections. Confocal

438 images from a 13 parameter 3 cycle IBEX experiment performed on mouse inguinal LN sections.  
439 Markers were visualized using either fluorescently-conjugated antibodies (Cycle 1) or oligo-  
440 conjugated antibodies and complementary fluorescent oligos (Cycles 2-3). See Figs. 6 and S7.  
441 Data are representative of 2-4 similar experiments.

## 442 **References**

- 443 1. K. Mao *et al.*, Innate and adaptive lymphocytes sequentially shape the gut microbiota and  
444 lipid metabolism. *Nature* **554**, 255-259 (2018).
- 445 2. A. Gola *et al.*, Prime and target immunization protects against liver-stage malaria in mice.  
446 *Sci. Transl. Med.* **10**, 460 (2018).
- 447 3. T.Z. Veres *et al.*, Allergen-induced CD4<sup>+</sup> T cell cytokine production within airway  
448 mucosal dendritic cell-T cell clusters drives the local recruitment of myeloid effector cells.  
449 *J. Immunol.* **198**, 895-907 (2017).
- 450 4. M.Y. Gerner, W. Kastenmuller, I. Ifrim, J. Kabat, R.N. Germain, Histo-cytometry: a  
451 method for highly multiplex quantitative tissue imaging analysis applied to dendritic cell  
452 subset microanatomy in lymph nodes. *Immunity* **37**, 364-376 (2012).
- 453 5. I. Sayin *et al.*, Spatial distribution and function of T follicular regulatory cells in human  
454 lymph nodes. *J. Exp. Med.* **215**, 1531-1542 (2018).
- 455 6. J. Schindelin *et al.*, Fiji: an open-source platform for biological-image analysis. *Nat.*  
456 *Methods* **9**, 676-682 (2012).
- 457 7. Z. Wang, A.C. Bovik, H.R. Sheikh, E.P. Simoncelli, Image quality assessment: from error  
458 visibility to structural similarity. *IEEE Trans. Image Process* **13**, 600-612 (2004).
- 459 8. D. Schapiro *et al.*, histoCAT: analysis of cell phenotypes and interactions in multiplex  
460 image cytometry data. *Nat. Methods* **14**, 873-876 (2017).
- 461 9. S. Berg *et al.*, ilastik: interactive machine learning for (bio)image analysis. *Nat. Methods*  
462 **16**, 1226-1232 (2019).
- 463 10. A.E. Carpenter *et al.*, CellProfiler: image analysis software for identifying and quantifying  
464 cell phenotypes. *Genome Biol.* **7**, R100 (2006).
- 465 11. S. Anders, W. Huber, Differential expression analysis for sequence count data. *Genome*  
466 *Biol.* **11**, R106 (2010).
- 467 12. S.K. Saka *et al.*, Immuno-SABER enables highly multiplexed and amplified protein  
468 imaging in tissues. *Nat. Biotechnol.* **37**, 1080-1090 (2019).

469

470

471
